# Supplementary material for: Six hundred years of South American tree rings reveal an increase in severe hydroclimatic events since mid-20th century
Source: PubMed Central journal article supplement — Proc Natl Acad Sci U S A. 2020 Jul 6;117(29):16816–23. doi: 10.1073/pnas.2002411117 (PMC7382209; doi:10.1073/pnas.2002411117), 2020-07-06
Supplement: pnas.2002411117.sapp.pdf [file pnas.2002411117.sapp.pdf]

1  
2  
3  
4  
5  
6  
7  
8  
9  
10  
11  
12  
13  
14  
15  
16  
17  
18  
19  
20  
21  
22  
23  
24  
25  
26  
27  
28  
29  
30  
31  
32  
33  
34  
35  
36  
37  
38  
39  
40  
41  
42  
43

Supplementary Information for

Six hundred years of South American tree rings reveal an increase in severe hydroclimatic events since mid-20th century

Mariano S. Morales, Edward R. Cook, Jonathan Barichivich, Duncan A. Christie, Ricardo Villalba, Carlos LeQuesne, Ana M. Srur, María E. Ferrero, Álvaro González-Reyes, Fleur Couvreux, Vladimir Matskovsky, Juan C. Aravena, Antonio Lara, Ignacio A. Mundo, Facundo Rojas, María R. Prieto, Jason E. Smerdon, Lucas O. Bianchi, Mariano H. Masiokas, Rocio Urrutia-Jalabert, Milagros Rodríguez-Catón, Ariel A. Muñoz, Moises Rojas-Badilla, Claudio Alvarez, Lidio Lopez, Brian H. Luckman, David Lister, Ian Harris, Philip D. Jones, A. Park Williams, Gonzalo Velazquez, Diego Aliste, Isabella Aguilera-Betti, Eugenia Marcotti, Felipe Flores, Tomás Muñoz, Emilio Cuq, José A. Boninsegna

Mariano S. Morales  
**Email:** mmorales@mendoza-conicet.gob.ar

**This PDF file includes:**

This Supplementary Information has the following sections:

1. Instrumental data set
2. Developing the instrumental scPDSI data set
3. SADA tree ring network
4. Standardizing SADA tree ring chronologies:
5. Point by point regression: the drought reconstruction method
6. Calibration and verification statistics of the reconstruction model
7. Queens Case Imputation and Smoothing (QCIS)
8. Historical hydroclimate reconstructions
9. Changes in extremes in South America regions
10. Large-scale ocean-atmosphere climate datasets (SST, SST\_N3.4, GPH500 and SAM)
11. Maximum Covariance Analysis for instrumental scPDSI and climate drivers
12. Comparisons to other ENSO and SAM reconstructions

One table, ten figures and three datasets accompany these sections and are referred to by them.

Table S1  
Figs. S1 to S10

Legends for Datasets S1 to S3  
SI References

44  
45  
46  
47  
48  
49  
50  
51  
52  
53  
54  
55  
56  
57  
58  
59  
60  
61  
62  
63  
64  
65  
66  
67  
68  
69  
70  
71  
72  
73  
74  
75  
76  
77  
78  
79  
80  
81  
82  
83  
84  
85  
86  
87  
88  
89  
90  
91  
92  
93  
94  
95  
96

**Other supplementary materials for this manuscript include the following:**

Datasets S1 to S3

Here we provide additional information regarding the SADA development and its validation.

**1. Instrumental data set.**

The global database of climate variables is based mostly on National Meteorological Services (NMS) meteorological stations with few high-altitude stations in remote areas with complex topographies, such as the Andes. To tackle these deficiencies we developed a monthly climate database by compiling records from hundreds of high-altitude meteorological stations from different institutional sources in addition to those from the NMS. Based on these data we developed an instrumental database of 992 precipitation and 292 temperature records (IANIGLA database), spatially distributed throughout the Andes between 12° and 56°S latitude. The meteorological records were changed to a common format and quality checked based as described below.

Monthly temperature anomalies were accepted if they met the following criteria:

- 1-  $(T - T_{\text{clim}}) < 3 \text{ sigma}$
- 2-  $(T - T_{\text{clim}}) < T_{\text{clim}} + 5^{\circ}\text{C}$

Where  $T$ = monthly temperature anomalies;  $T_{\text{clim}}$ = historic mean of monthly temperature.

Monthly precipitation anomalies were accepted which met the criteria

- 1-  $(Pr - Pr_{\text{clim}}) < 3 \text{ sigma}$
- 2-  $(Pr - Pr_{\text{clim}}) < Pr_{\text{clim}} \times 5$
- 3-  $Pr - Pr_{\text{clim}} < 100\text{mm}$

Where  $Pr$ = total monthly precipitation anomalies;  $Pr_{\text{clim}}$ = historic mean of the monthly precipitation.

For those cases in which these conditions were not met and extreme values were present, a visual examination and comparison with neighboring stations was applied to determine whether the extreme matched the regional climate pattern. If not, the monthly data point was removed from the database. To create longer and more complete series, we merged the final versions of the series with matching series from the monthly data set compiled by the Climatic Research Unit Time Series (CRU TS 3.24) (1). The resulting merger and addition of the new dataset was included in later versions of CRU TS (such as CRU TS 4.03). Figure S1 shows maps by decade for the period 1901-2000 of the changing density of precipitation stations available for interpolation onto the CRU TS 3.24 + IANIGLA database precipitation field. There is an obvious loss of local precipitation data for interpolation prior to 1950, particularly in southern Patagonia, northern Chile, northeastern Argentina, Bolivia, Paraguay, Uruguay, southern Brazil and southern Peru (Fig. S1). The gridding methodology in areas devoid of stations produces a loss of variance in the CRU dataset, otherwise referred to as “relaxation to climatology” (2).

To develop a more complete and parsimonious instrumental dataset, an ensemble of the interpolated fields of monthly total precipitation, temperatures (mean, maximum, minimum), and potential evapotranspiration observations was produced from three climate databases. The employed databases were: 1) precipitation, temperature, and potential evapotranspiration data from the CRU TS 3.24, University of East Anglia (1), enhanced by the incorporation of precipitation and temperature records from the National Institute of Snow Glaciology and Environmental Sciences (IANIGLA-CONICET) database; 2) precipitation and air temperature

97 datasets from the University of Delaware (3); and 3) the precipitation dataset from the Global  
98 Precipitation Climatology Centre (GPCC) (4).  
99 Figure S2 shows the correlation between the CRU TS 3.24 DJF precipitation dataset and the  
100 ensemble dataset of this study for three periods: A) 1901-2015, B) 1901-1950, and C) 1951-2015.  
101 A clear decrease in the correlation coefficients over the Andes is observed during the three  
102 periods as a result of the lack of stations in these areas in the CRU\_TS 3.24 data set. In  
103 particular, poor correlations appear in southern Bolivia and the Andean Cordillera during the  
104 period 1901-1950 (Fig. S2b). The climate data ensemble produced by incorporation of the  
105 IANIGLA instrumental database represents a significant improvement over the original CRU TS  
106 database because it increases the density of high-altitude meteorological stations. Nevertheless,  
107 even in the ensemble precipitation dataset there are still significantly under-represented regions in  
108 the Andes, southern Bolivia, and southern Patagonia, especially prior to 1951. A similar reduction  
109 in meteorological station coverage before 1951 was noted over China during the development of  
110 the Monsoon Asia Drought Atlas (MADA; 5). This led to the decision to begin the MADA  
111 calibration period in 1951 in order to use the highest quality instrumental data for developing the  
112 pointwise reconstruction models. The same choice based on a similar argument has been made  
113 here for production of the SADA.

## 114 115 **2. Developing the instrumental scPDSI data set.**

116 The scPDSI (6) is calculated from time series of precipitation and temperature, together with the  
117 estimated potential evapotranspiration (PET, see references in 1). In this study instrumental  
118 monthly scPDSI was computed following Wells et al. (6) for the period 1901-2015. One-half  
119 degree gridded monthly scPDSI was the target field used for reconstruction. The monthly  
120 instrumental scPDSI data were seasonalized to produce austral summer (DJF) average values to  
121 be used for tree-ring based reconstruction at each grid point. Summer is the principal growing  
122 season of trees and was also the season targeted in the other drought atlases (NADA, MADA,  
123 OWDA, ANZDA, MXDA, ERDA).

## 124 125 **3. SADA tree-ring network.**

126 286 tree ring chronologies have been developed, mostly concentrated on both sides of the Andes  
127 Cordillera (16°-56°S), from the Altiplano and intermontane subtropical valleys to the Patagonian  
128 forests at the southern tip of the continent (Table S1; Fig S3). New collections in tropical lowlands  
129 have additionally allowed extension of the geographical coverage of tree ring records to lower  
130 latitudes and elevations. Figure S3, shows the network of 286 annual tree ring chronologies. The  
131 length of the target period (1400-2000 C.E.) for reconstruction of scPDSI results from the  
132 presence of a relatively high number of tree ring chronologies and good spatial coverage along  
133 the Andes. Sixty-five of these tree ring chronologies completely cover the 15th century and are  
134 well distributed throughout the Altiplano, central Chile, and Northern Patagonia (Fig. S3). The  
135 number and the spatial coverage of the tree ring chronologies increase during the following  
136 centuries, providing an adequate network to reconstruct regional South American hydroclimate  
137 for the past six centuries.

## 138 139 **4. Standardizing SADA tree ring chronologies.**

140 The tree ring chronologies used for reconstruction were standardized (7) to remove biological  
141 growth trends related to increasing tree size and age and to render the interannual changes in  
142 radial growth stationary over time. This process of detrending and transformation of the basic raw  
143 tree ring measurements results in a set of dimensionless growth indices with a defined mean of  
144 1.0 and a standard deviation related in part to the strength of the primary climate signal contained  
145 in the indices. This allows the standardized indices from many samples to be averaged into a  
146 single tree ring chronology at a specific site for climate reconstruction. There are 286 of these site  
147 chronologies in the SADA tree ring network.

148 The detrending method is a key step in preparing tree ring series for climate reconstruction, but it  
149 can also remove low and medium frequency climate-related variance from centennial to  
150 millennial-length tree ring series. This is related in part to the 'segment length curse' (8), because

151 it is not possible to retain low frequency variability in data that is longer than the tree ring series  
152 being detrended. Additionally, the different growth curve methods used in detrending can have  
153 strong effects on the retention of low-to-medium frequency variance due to climate. The signal-  
154 free (SF) method (9) minimizes trend distortion artifacts, principally at the ends of the series being  
155 detrended, and recovers common medium-to-low frequency variability throughout the length of  
156 the tree ring chronology that may have been inadvertently removed by the detrending curves as  
157 initially applied. This cannot be done in one step because the trend distortion artifacts and lost  
158 common variance are not known at the start. Rather, the SF is an iterative procedure that is  
159 applied to the raw tree ring measurements until no change in the final site chronology is detected.  
160 See Melvin and Briffa (9) for details. Thus, SF is an iterative detrending method that can  
161 potentially protect from the loss of common low-to-medium frequency variability caused by  
162 traditional detrending methods (e.g., 7). However, different curve fits in combination with SF can  
163 produce big changes in tree index series and iterative convergence may not occur. Therefore, in  
164 this study we used different methods for some chronologies. In most cases we applied a negative  
165 exponential curve in combination with the SF method (N=236 tree-ring chronologies), but in some  
166 cases a negative exponential or age-dependent curve without SF was used (N=50 tree ring  
167 chronologies) to avoid artifact variation in tree growth probably unrelated to climate. The tree ring  
168 chronologies were produced with the RCSigFree and ARSTAN programs (Tree Ring Lab-LDEO,  
169 Columbia University).

#### 171 **5. Point by point regression: the drought reconstruction method.**

172 To reconstruct the austral summer (DJF) scPDSI grid from the 286 tree ring chronology network  
173 for the SADA domain, we used the well-tested point-by-point Regression method [PPR (10-13)].  
174 This sequential method automatically applies regressive models to the principal components (PC)  
175 of the tree ring chronologies during a common calibration period between the predictors (tree  
176 rings) and the predictands (scPDSI data) for each grid point of the scPDSI grid (14). The PPR  
177 approach uses a search radius around each grid point of the scPDSI grid to locate tree ring  
178 chronologies with plausibly stable causal relationships with the grid point in question. This  
179 process avoids the need to grid tree ring data and allows each chronology to be separately  
180 analyzed as a predictor of scPDSI in the past. There is no *a priori* specific search radius and  
181 several considerations need to be made during the selection, such as the geographical  
182 distribution of tree ring series, topography, and climatology. For the North American Drought Atlas  
183 (NADA) the optimum search radius to reconstruct PDSI was 450 km. However, for the MADA and  
184 ANZDA, in which the tree ring networks were more irregularly distributed (mainly in mountain  
185 regions), an ensemble of different search radii was used. In South America the tree ring  
186 chronologies developed are largely distributed along the Andes Cordillera and large low elevation  
187 areas (Patagonian steppe, the Pampas and Chaco region) have no or very short tree ring  
188 chronologies, not suitable for inclusion in the database. Larger climate patterns tend to occur over  
189 flat areas with relatively low topographic complexity (e.g. the Great Plains in North America or the  
190 Mongolian steppes) and climate variability can be captured by tree rings from these or adjacent  
191 areas. Each grid point reconstruction was produced using a minimum of 20 tree ring  
192 chronologies. However, where insufficient predictors occurred within the initial search radius, the  
193 range was progressively expanded by 50 km until the minimum number of chronologies were  
194 located. In the Andes region a short radius is more useful to avoid the inclusion of too much noise  
195 due to topographic complexity, whereas in flat areas without tree ring chronologies it was  
196 necessary to use larger search radii. The reconstructed scPDSI over regions without tree ring  
197 chronologies was therefore estimated using predictors mostly from the Andes. Consequently, an  
198 ensemble of search radii with distances of 200, 500, 800, 1100, and 1500-km was used, similar to  
199 the approach used to develop the MADA (12). Another PPR variable that can be optimized is the  
200 screening probability. This variable defines the correlation probability threshold for retaining the  
201 best subset of candidates to use for reconstruction, but may also discard useful tree ring  
202 predictability information if screening probabilities are too restrictive. Here, we do not use a hard  
203 screening threshold, but instead weight all of the tree ring series within a given search radius by  
204 the power ( $\rho$ ) of their correlations with the grid point scPDSI over the calibration period. We use

205 an ensemble approach with unweighted ( $p=0$ ) and weighted power correlation ( $p=1$ ;  $p=2$ ). Using  
206 the five search radii and three power weightings, we created a 15-member ensemble  
207 reconstruction, averaging and recalibrating the output model members, and revalidating directly  
208 against instrumental data. The average correlation between ensemble members at each grid  
209 point were then calculated. This averaging process has been shown previously to reduce noise  
210 and increase reconstruction skill (10, 12, 13). The 15-member ensemble mean, based on the bi-  
211 weight robust mean, shows a more parsimonious representation of the results and modestly  
212 improved accuracy in the model statistics in most cases compared to individual ensemble  
213 members.

214 Due to the modulating effect of the Andes and the influence of distinct oceanic and atmospheric  
215 patterns such as the El Niño Southern Oscillation, the Southern Annular Mode, and the South  
216 American Summer Monsoon, South America's precipitation regime is particularly variable and  
217 different trends in precipitation exist on different sides of the Andes (15), particularly in the high  
218 elevation Andes between  $24^{\circ}$  and  $38^{\circ}$  S. To avoid predictors in the scPDSI reconstruction from  
219 west (east) of the Andes to have influences on a grid point on the east (west) of the Andes, where  
220 climate trends could be opposite, we ran two independent ensemble PPR (EPPR). The first PPR  
221 omits tree ring chronologies from the Chilean region (west side of the Andes between  $24^{\circ}$ - $38^{\circ}$ S)  
222 and considers all remaining tree ring chronologies as predictors. The second PPR only  
223 considered predictors from the limited sites west of the Andes. Subsequently both 15-member  
224 ensemble reconstructions were merged to create a final reconstruction. This merging process  
225 may cause artificial abrupt changes at the borders. To avoid possible contrasting changes, both  
226 ensemble reconstructions share the chronologies from the Chilean region located between  $20^{\circ}$ -  
227  $24^{\circ}$ S and  $38^{\circ}$ - $41^{\circ}$ S. Since the austral summer (DJF) span two calendar years, we assign to each  
228 one of the 600 scPDSI reconstructed summers the calendar year of December. i.e. The summer  
229 corresponding to the period 1990-1991 is assigned the year 1990.

230

## 231 **6. Calibration and verification statistics of the reconstruction model.**

232 As mentioned in the instrumental data section, we observe a sharp decrease in the number of  
233 meteorological stations and limited spatial sampling in the SADA domain before 1951 (Fig. S1).  
234 The first reconstruction experiments therefore used the period 1975-2000 for calibration and  
235 1950-1974 for verification. The range of variability represented within this calibration period is  
236 strongly influenced by the positive phase of the Pacific Decadal Oscillation (PDO) between the  
237 mid-1970s and late 1990s, which had a strong influence on rainfall variability across much of  
238 South America.

239 For the second reconstruction experiments, we calibrated our reconstruction models on the full  
240 1951-2000 period, which is the best represented by instrumental data, and verified on the 1921-  
241 1950 period, characterized by fewer stations and poorer spatial representation. For the calibration  
242 period we calculate the well-known coefficient of determination (CRSQ or  $R^2$ ) and the cross-  
243 validation reduction of error [CVRE (see Fig. 1b,c from the main text)]. Statistics for the  
244 verification period include the square of the coefficient of determination (VRSQ), the reduction of  
245 error (VRE), and the coefficient of efficiency (VCE) for the period 1921-1950 (Fig. S4). Details of  
246 verification statistics are given in Cook et al. (13, 14). VRSQ is a measure of fractional common  
247 variance, and has widespread use in dendroclimatology (14). Figure S4a shows the highest  
248 fraction of variance ( $>40\%$ ) over southern Brazil, central Chile and northern Patagonia, where  
249 high-quality instrumental data were available during the verification period. The VRE map (Fig.  
250 S4b) shows a very similar pattern, while the VCE indicates some reconstruction skill for only  
251 about 10% of the SADA domain (Fig. S4c). The VCE is the most rigorous of these verification  
252 statistics and the SA areas with poor instrumental and tree ring representations generally do not  
253 pass this test.

254 In summary, these verification statistics based on split calibration/validation methods indicate that  
255 the reconstruction models have relatively low predictive power. However, these results may be  
256 expected considering the low number of instrumental records over the 1921-1950 verification  
257 period. Figure S4d shows the weakest spatial correlation coefficients between instrumental and

258 reconstructed scPDSI indices during 1921-1950 (mean=0.07; median=0.06). However, a sharp  
259 increase in spatial correlations was observed for the period 1960-2000 (mean=0.5; median=0.52).  
260 Based on the experiments above, calibration/validation of the SADA used a leave-one-out  
261 approach (16, 17). We selected the CVRE (see Fig. 1c from the main text) as the target  
262 verification stat for the reconstruction models, because the CVRE is based on a leave-one-out  
263 procedure. This method is very useful when the observed records are short, allowing the  
264 calibration and validation of the model using the full range of scPDSI data from 1951 to 2000. The  
265 approach tests the model's ability to predict new data that were excluded from the prediction, in  
266 order to flag problems of overfitting or selection bias and to give insight on how the model will  
267 adjust to an independent dataset. This technique works by partitioning a sample of a known  
268 dataset into complementary subsets, against which the model is tested. To reduce the variability  
269 and to give an estimate of the model's predictive performance, it is necessary to perform multiple  
270 runs of cross-validation using different partitions, and then average the multiple validation results.

## 271 272 **7. Queens Case Imputation and Smoothing (QCIS)**

273 The grid point reconstructions generated by the EPPR method may vary in their temporal length  
274 due to the different time periods covered by the chronologies available within each of the five  
275 search radii. The number of empty grid points also increases back in time. Additionally, “pixeled  
276 noisy” patterns and the presence of occasional “erratics” (e.g., reconstructed values inconsistent  
277 with surrounding values) are apparent in the reconstructed fields, which are assumed to be due in  
278 part to the strictly local reconstruction properties and random effects of the EPPR reconstruction  
279 models. This implies the need to smooth the SADA reconstruction field in a coherent manner.  
280 This was done by applying to each grid point reconstruction the Queen’s Case Imputation and  
281 Smoothing (QCIS) methods, based on the Queen’s Case Adjacency model used in spatial  
282 statistics (18). This method allows for local re-estimation and smoothing of the annual fields using  
283 the following equation:

$$284$$
$$285 Y_{i,t} = \sum \beta_j X_{j,t} \quad j = 1, 9 \quad i = 1, N \quad t = 1, M,$$
$$286$$

287 Where  $Y$  is the smoothed field and  $X$  is the initial, unsmoothed reconstruction field. Where  $N$  is  
288 the total number of grid points and  $M$  is the total number of years. The QCIS method uses a 9-  
289 point regression kernel to re-estimate the reconstruction at center grid point  $i$  for each year  $t$  using  
290 the  $j$  (1-8) surrounding grid points reconstructions produced initially by EPPR, along with the  
291 center grid point reconstruction itself at  $i$ . The addition of grid point  $i$  as a predictor, guarantees a  
292 new centrally weighted estimate at that grid point. The number of  $j$  grid points is  $<8$  at the borders  
293 of the domain or in areas with empty reconstruction grid points. The regression betas ( $\beta_j$ ) of the 9  
294 reconstructions determine the relative weighting of the predictors of the center grid point  
295 reconstruction. To produce each new QCIS grid point reconstruction, QCIS recalibrates the  
296 reconstruction at grid point  $i$  using the available reconstructions at  $i$  and  $j$  as predictors and the  
297 same instrumental climate data (predictand) used by EPPR. Similar to EPPR, this procedure is  
298 applied point by point over the field. We also used the same calibration and verification periods,  
299 and the same principal components regression method used in producing the original EPPR field  
300 reconstruction.

301 The regression kernel locally smooths each spatial field of reconstructions, resulting in a central  
302 weighted average of up to 9 prior reconstructions. This smoothing process eliminates “erratic”  
303 values. Moreover, the imputation process in empty grid points  $i$  can occur when adjacent  $j$  grid  
304 points cover a longer time period than  $i$ , hence the new QCIS reconstruction at grid point  $i$  will be  
305 extended back in time using the EPPR nesting procedure. This imputation and smoothing method  
306 can be applied iteratively  $k$  times with progressively more smoothing of the field. For the SADA  
307 field we used up to 2 QCIS iterations. Figure S5 shows the effects of imputation and smoothing  
308 over four original reconstructed years after the application of the QCIS method. The main  
309 wet/drought spatial patterns are preserved after QCIS application for the four years. However, the  
310 “pixeled noisy” patterns found in the “Original fields maps” were highly reduced by the smoothing  
311 QCIS process (QCIS fields). Additionally, the empty grid points (8%) in the northeast of the

312 domain at year 1400, have been filled by the imputation process. Complete fields in the SADA  
313 begin in C.E. 1490.

314

### 315 **8. Historical hydroclimate reconstructions.**

316 Historical documents from Bolivia, Chile, and Argentina have allowed the development of  
317 continuous high-resolution reconstructions (seasonal, annual) of climatic variations during past  
318 centuries (19). In order to validate our drought/pluvial reconstructions with independent records of  
319 climate variability, we selected three regions (Fig. 1 of the main text) for which hydroclimatic  
320 reconstructions have been developed from historical documents. We compared these  
321 independent document-based reconstructions with the three regionally averaged scPDSI time  
322 series (Fig. S6). All the historical hydroclimate events and the regional scPDSI averaged records  
323 are compiled in Data S1.

324 *Altiplano region:* Gioda and Prieto (20) reconstructed the interannual precipitation variability from  
325 Potosí, Bolivia, for almost 200 years (1585-1807 period). Silver extraction from the Potosí mine  
326 (4000 masl), vital to the Spanish economy at that time, was highly dependent on water runoff  
327 used to power the silver mills. The Spanish consistently recorded pluvials and droughts during the  
328 spring–summer season. These were compiled in the Actas Capitulares archives of Potosí (20).  
329 Data S1 shows dates of the 54 dry and very dry events and the 35 wet and very wet events used  
330 for comparison with the averaged scPDSI series for the Altiplano area framed between 17-23°S  
331 latitude and 67-70°W longitude (Fig. S6a and Fig. 1a main text).

332 *Central Chile region:* Historical information of snowy and dry event years was used to reconstruct  
333 past hydroclimate variability in the Andes from central Chile and west Mendoza, Argentina, from  
334 the 16th century to 1998 (21). The list of dry and snowy events came from the following sources:  
335 1) documentary reports on the state of the snow in the main pass that links Santiago and  
336 Mendoza, between 1760 and 1890 (22); 2) newspaper reports of snow depth along the same  
337 international pass from 1885 to 1998 (22, 23); 3) reports on discharge of the Mendoza river basin  
338 for the period 1600-1960 (24); 4) list of wet years as evidence of El Niño strength between 1535  
339 and 1900 (25). The list of the historical extreme events is reported in Data S1. Figure S6b, shows  
340 the comparison and good correspondence between the historical snowy and dry events with the  
341 averaged scPDSI for the central Chile region.

342 *La Plata Basin region:* Prieto (26) reconstructed the Parana River floods between 1585 and 1815  
343 based on written Spanish records from the cities of Santa Fe and Corrientes. These records are  
344 mainly local, often weekly, government reports (the Actas Capitulares), which document  
345 socioeconomic and environmental events, especially those with significant economic impacts.  
346 Data S1 reports the dates of the 38 floods of the Paraná River between 1585 and 1815 (26) that  
347 were used to compare with the scPDSI average for the area between 31-37° S latitude and 56-  
348 60° W longitude. Again, good correspondence was found between flood occurrence and positive  
349 scPDSI records (Fig. S6c).

350

### 351 **9. Changes in extremes in South America regions**

352 Four regions experiencing different climate conditions were selected to explore scPDSI variability  
353 and the return time of extreme events: the Altiplano, central Chile, La Plata basin and west  
354 Patagonia (Fig. S7). The scPDSI reconstructions for the four regions are characterized by inter-  
355 annual to multi-decadal variations. Severe persistent droughts and pluvials were identified in each  
356 region (left panels Fig. S7a-d).

357 The return-time analysis for the Altiplano (Fig. S7e) showed that the frequency of extreme dry  
358 events was the highest (1-event/15yrs) in the second half of the 20th century, but was not much  
359 different than the 17th and 18th centuries (1-event/18yrs). However, no pluvials occurred during  
360 most of the 20th century. The opposite situation took place during 15th century where just one dry  
361 extreme event was recorded, while one pluvial occurred every 18 years. The return-time analysis  
362 of extreme drought events in central Chile was relatively constant over the study period, ranging  
363 between one dry event every 20-30 years (Fig. S7f). Extreme pluvial events show non-stationary  
364 frequency occurrences over the study period (Fig. S7f). Low frequencies of extreme pluvial  
365 occurrences were recorded during the first half of the 18th and second half of the 20th centuries

366 (Fig. S7f), while high frequencies were recorded during first half of the 15th (1-event/12-15yrs)  
367 and the first half of the 17th and 19th centuries (1-event/17-19 yrs). The region of La Plata basin  
368 is characterized by a sustained increase in the rate of occurrence of pluvial extremes, with the  
369 highest rates recorded during the last decades of the 20th century (1-event/12 yrs; Fig. S7g),  
370 while the return time of extreme drought events was high during the 16th and 17th centuries (1-  
371 event/13-20 yrs) and maintained relatively low and constant activity during the 18th, 19th, and  
372 20th centuries (1-event/20-30 yrs; Fig. S7g). The Patagonia region showed reduce occurrence of  
373 extreme drought events during the 15th and 16th centuries, and increased since the mid-17th to  
374 the end of the 20th century (1-event/17-19 yrs; Fig. S7h). Extreme pluvials were more variable  
375 and show low return periods during the 15th, second half of the 18th, and first half of the 19th  
376 centuries, and were highest during the second half of the 20th century (1-event/12 yrs; Fig. S7h).  
377

#### 378 **10. Large-scale ocean-atmosphere climate datasets (SST, SST\_N3.4, GPH500 and SAM)**

379 We retrieved the global dataset of monthly averaged SST fields from the Hadley Centre Sea Ice  
380 and SST (HadISST) dataset that is available online from the National Center for Atmospheric  
381 Research (NCAR, 27). The HadISST data record extends back to 1870, and is spatially gridded  
382 with 1°x1° resolution, ranging in longitude from 180°W to 180°E. We also downloaded monthly  
383 anomalies of the HadISST averaged over the tropical Pacific NINO 3.4 region, an area between  
384 170°-120°W longitude and 5°N-5°S latitude. This dataset is available online from the Royal  
385 Netherlands Meteorological Institute (KNMI, 28)

386 The global dataset of monthly averaged geopotential height at 500 mb (GPH500) was retrieved  
387 from the National Center for Environmental Prediction (NCEP, 29). These data cover the period  
388 1948–present and have a spatial resolution of 2.5°x2.5°. Finally, the Southern Annular Mode index  
389 (SAM; 1957-present) was downloaded from the British Antarctic Survey (BAS, 30) and the  
390 methodology of the index development is discussed in detail in Marshall (31).

391

#### 392 **11. Maximum Covariance Analysis for instrumental scPDSI and climate drivers**

393 To check the robustness of the Maximum Covariance Analysis (MCA) results derived from the  
394 reconstructed scPDSI from the SADA and ANZDA, we applied the MCA to the instrumental  
395 scPDSI and summer (DJF) Sea Surface Temperatures (SSTs) and the summer (DJF)  
396 Geopotential Heights at 500 hpa (GPH500). Figure S8 maps the MCA patterns for the latter and  
397 indicates that there is a strong degree of similarity between the spatial patterns of the coupled  
398 variability derived from MCA using the instrumental and reconstructed scPDSI in the analysis.  
399

#### 400 **12. Comparisons to other ENSO and SAM reconstructions**

401 The ENSO and SAM estimation (ENSO-e and SAM-e), derived from the MCA (Fig. 4c,d), were  
402 compared with other ENSO and SAM reconstructions (Fig. S9). Tree-ring based NINO 3.4 index  
403 reconstructions were developed by Cook et al. (32), Li et al. (33) and Cook et al. (34), while  
404 multiproxy NINO 3.4 index reconstructions were developed by Wilson et al. (35) and Emile-Geay  
405 (36). Figure S9, demonstrates positive correlations between ENSO-e and the five  
406 reconstructions, ranging from 0.20 (vs. Wilson 2010) to 0.73 (vs. Cook 2018). The 30-yr moving  
407 correlation, plotted below each comparison (Fig. S9), shows changes in the stability of the  
408 relationship across the entire 500 yrs, with some periods very strong ( $r > 0.6$ ) and others weak ( $r$   
409  $< 0.1$ ).

410 SAM reconstructions are few in relation to those of ENSO, and they are not totally independent  
411 since they share tree ring proxies. Here we compare our estimated SAM-e with one tree ring (37)  
412 and two multi-proxy based SAM reconstructions (38, 39). Figure S10 show the comparisons and  
413 moving correlations between these records. SAM-e is well correlated with the Villalba and  
414 Datwyler reconstructions ( $r=0.45$  and  $r=0.52$ , respectively), while it is weakly correlated with the  
415 Abram et al. reconstruction. The moving correlations below each reconstruction comparisons are  
416 relatively stable over time for the two first comparisons, and is weak and unstable for the last  
417 reconstruction.  
418



419  
420

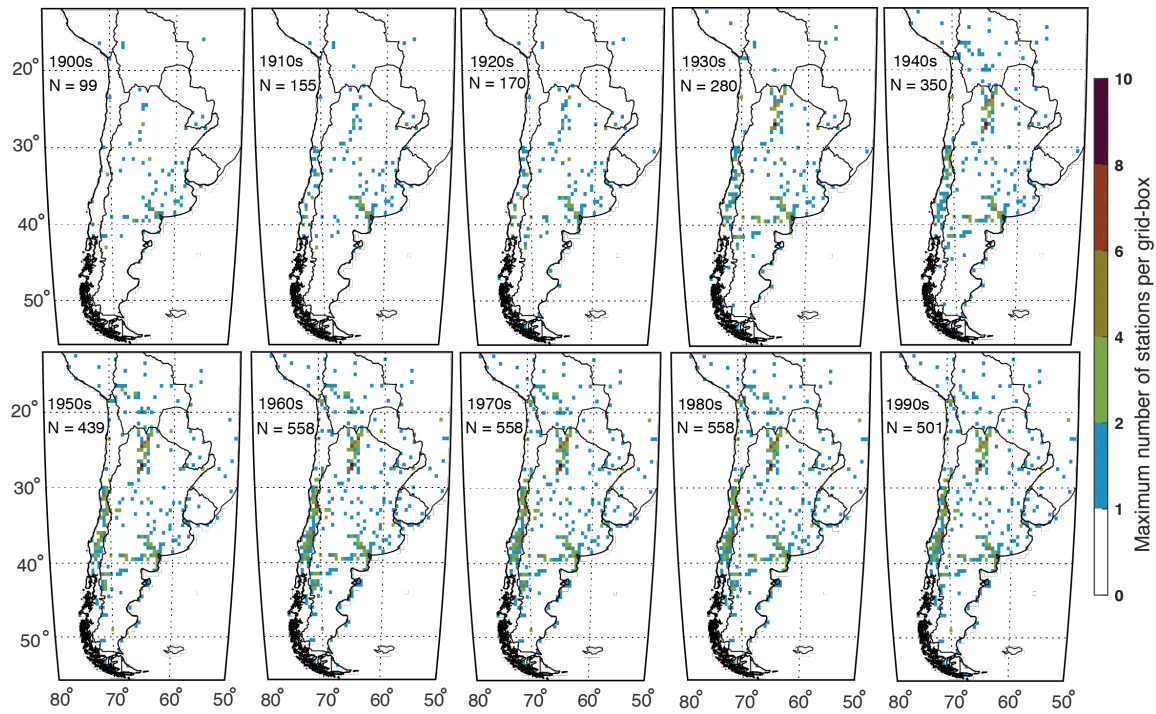

421  
422  
423  
424  
425  
426  
427

**Fig. S1.** Spatial distribution and number of available precipitation stations by decade for interpolation on the half-degree regular grid used to produce the CRU TS precipitation field. A relatively good spatial representation of stations over the SADA domain is observed since the 1950s.

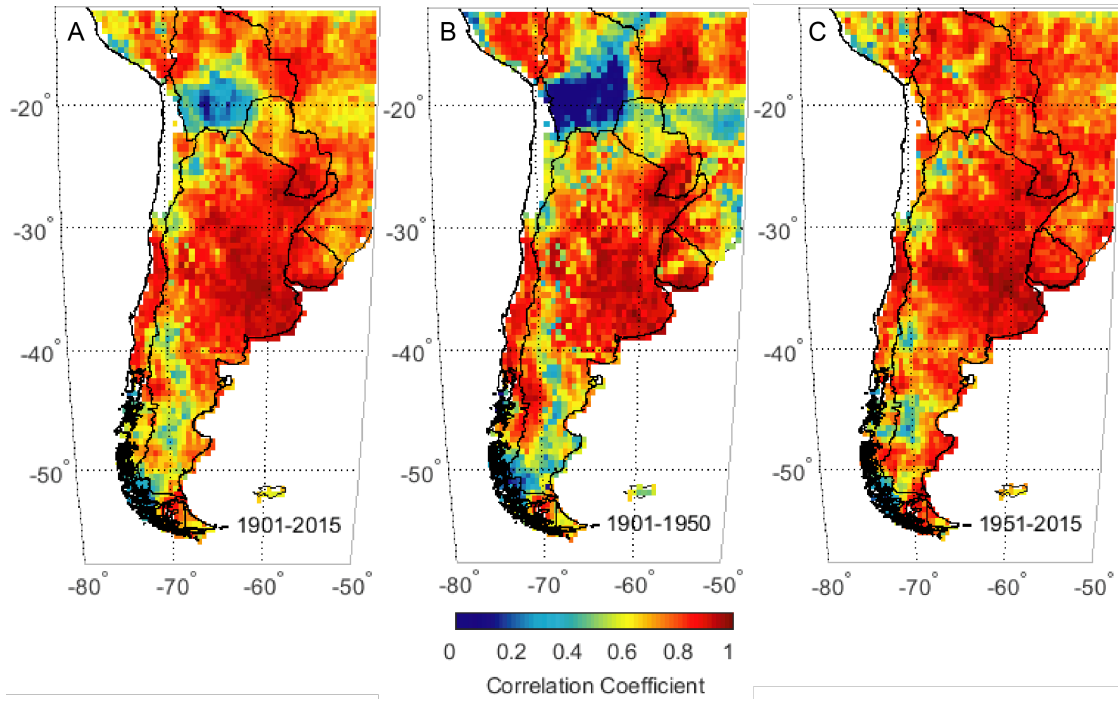

428  
429

430 **Fig. S2.** Field correlation coefficients between CRU-TS 3.24 DJF average precipitation dataset  
 431 and the DJF average of the ensemble precipitation dataset used in this study for the periods (A)  
 432 1901-2015, (B) 1901-1950 and (C) 1951-2015.  
 433

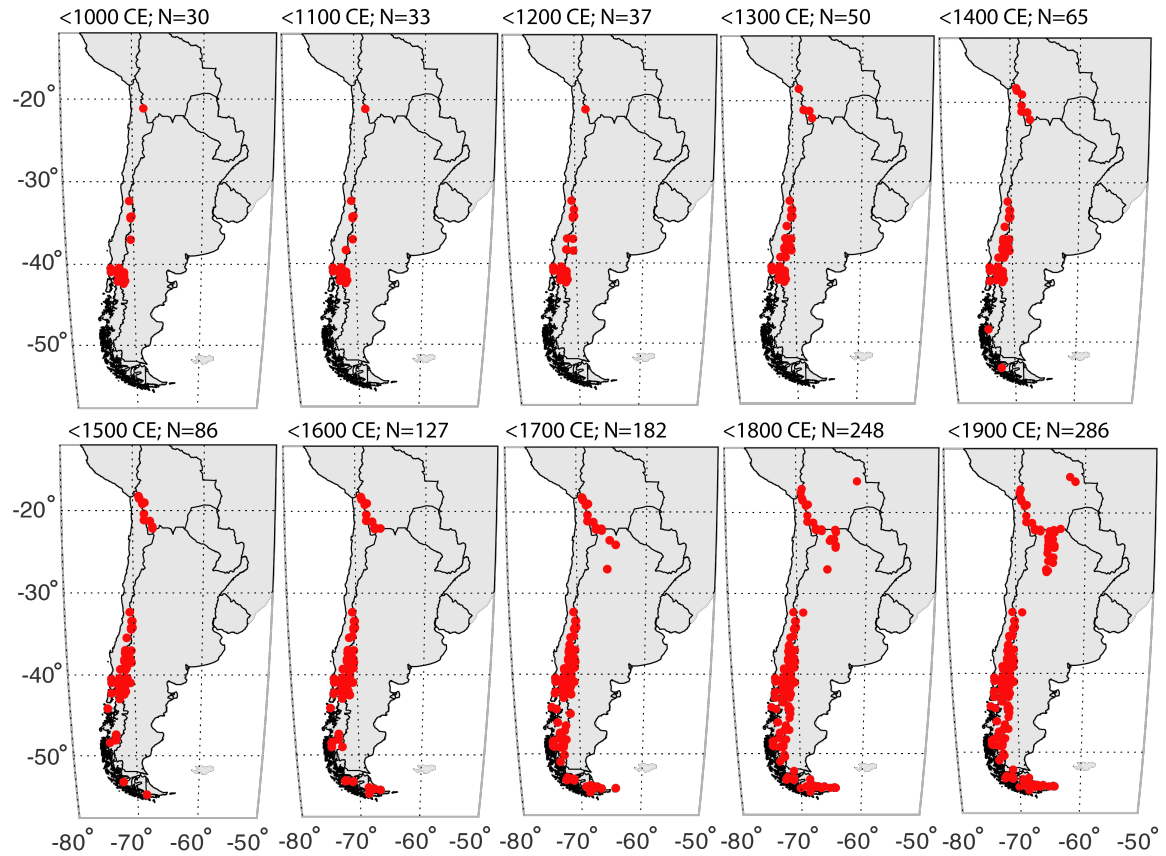

434  
 435  
 436  
 437  
 438  
 439  
 440  
 441  
 442

**Fig. S3.** Geographical distribution of tree-ring chronologies in the SA study domain during the last millennium. The N located in the top of each box represents the number of tree ring chronologies used to reconstruct the scPDSI. Note the significant reduction in tree ring chronologies before 1400 C.E.

443  
444

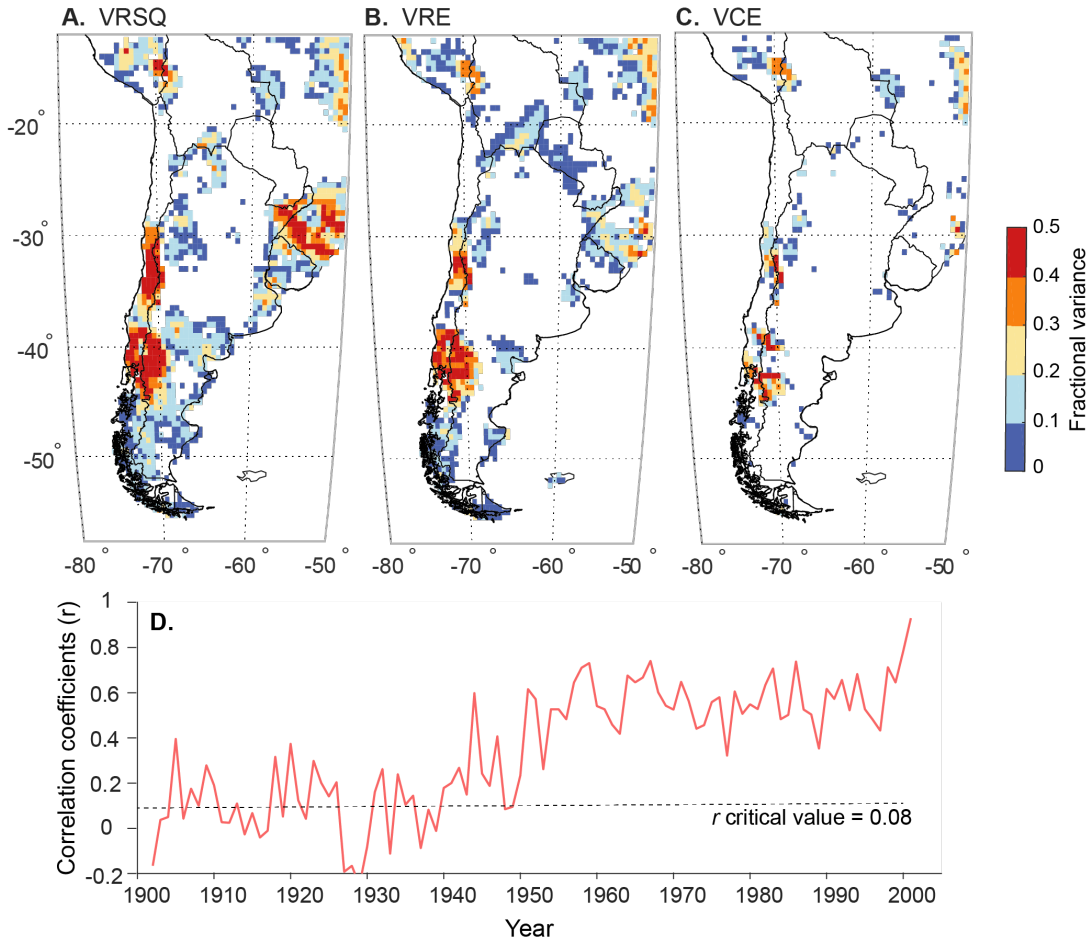

445  
446 **Fig. S4.** Validation statistic maps of the 15-member ensemble-average SADA reconstructions for  
447 the period 1921-1950. All statistics are in units of fractional variance. Only those grid points that  
448 verify at the 1-tail 90% confidence level for (A) VRSQ, and include (B) VRE and (C) VCE values  
449  $>0$ , are plotted. (D) Time varying series of the spatial correlations between the instrumental and  
450 reconstructed scPDSI index for the period 1901-2000. Note the small correlation coefficients  
451 between 1901-1950 and the increase in the spatial correlations beginning in the 1950s.  
452  
453

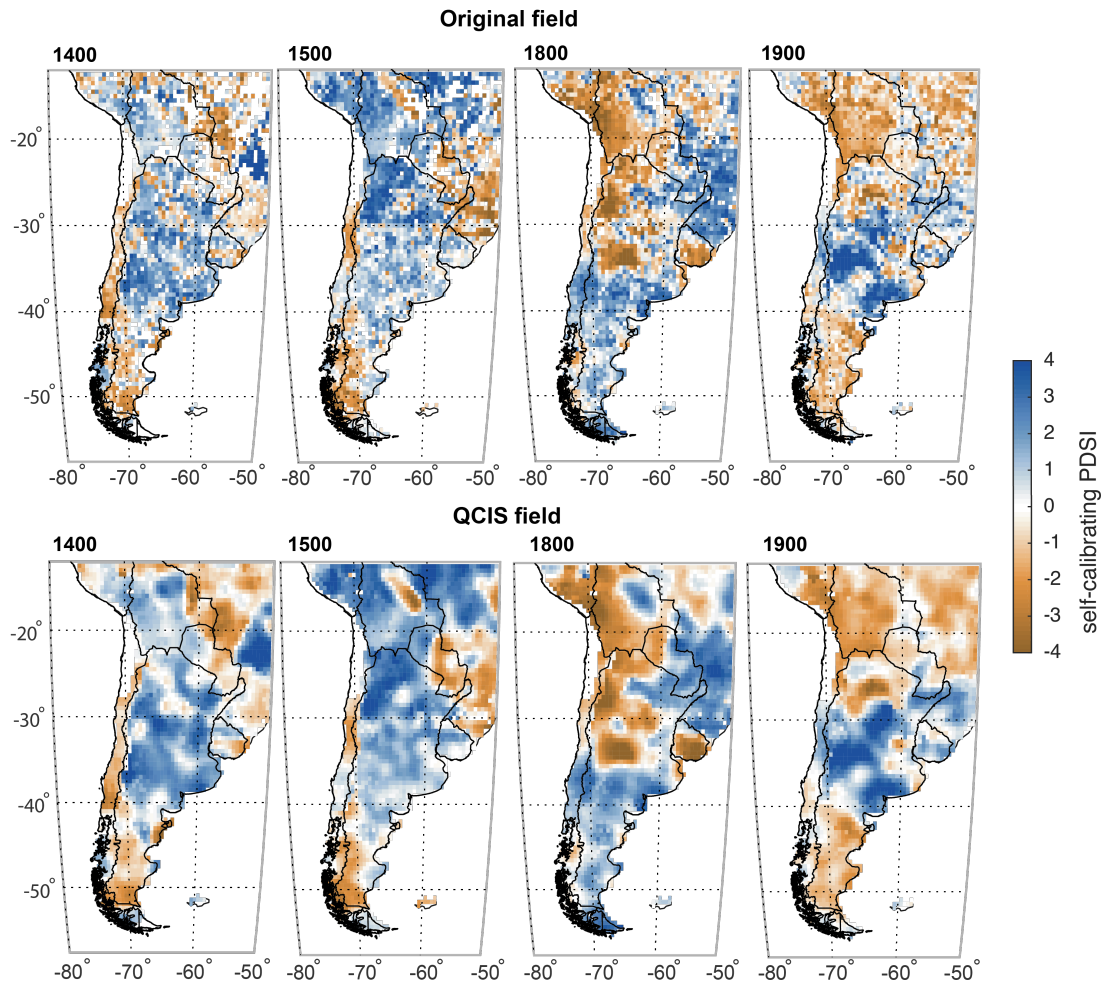

454  
 455  
 456  
 457  
 458  
 459

**Fig. S5.** Comparisons of four annual SADA maps (1400, 1500, 1800 and 1900) showing the effects before (Original field) and after (QCIS field) the application of the QCIS method on the EPPR reconstructed fields.

460  
461

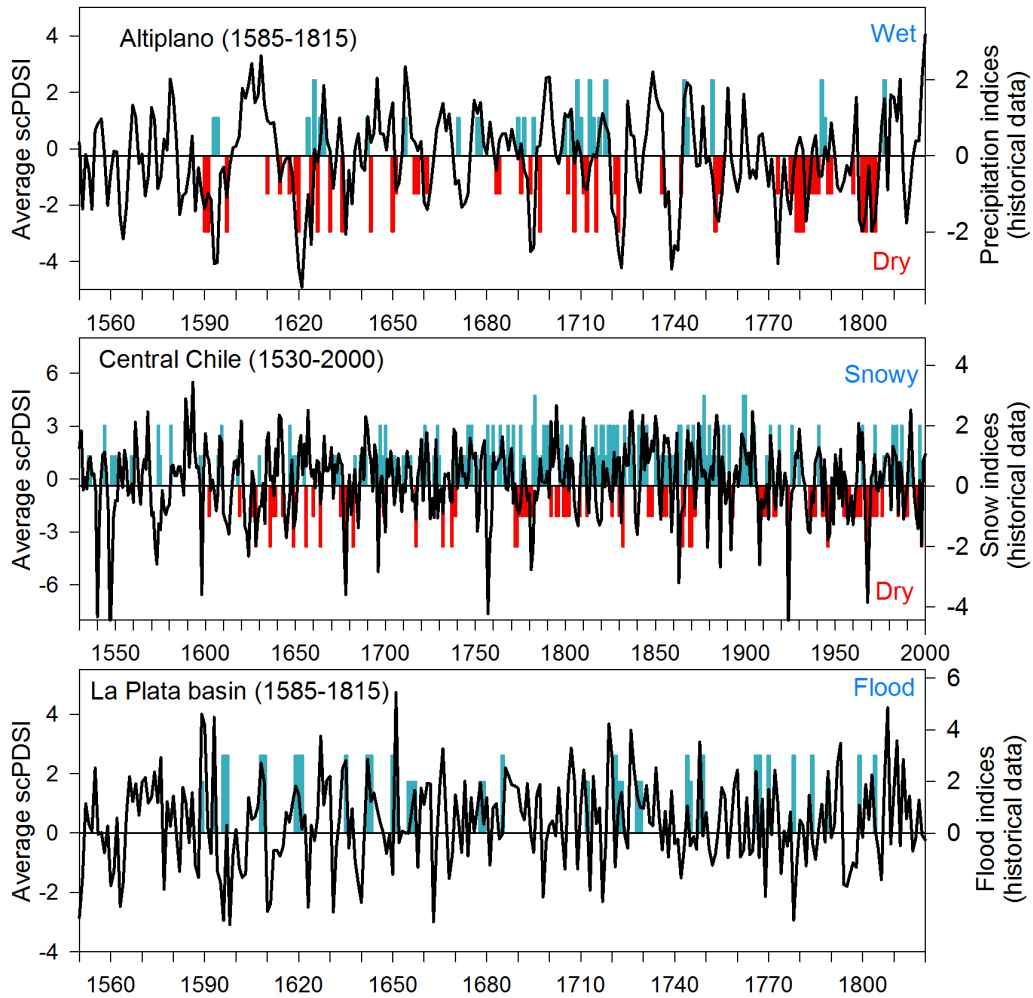

462  
463 **Fig. S6.** Comparison between historical hydroclimate (blue and red bars) and tree ring based  
464 scPDSI reconstructions (solid black line) for (A) Altiplano, (B) Central Chile and (C) part of the La  
465 Plata basin. Historical data and the tree ring reconstructions show correspondence during wet  
466 and dry years.  
467  
468

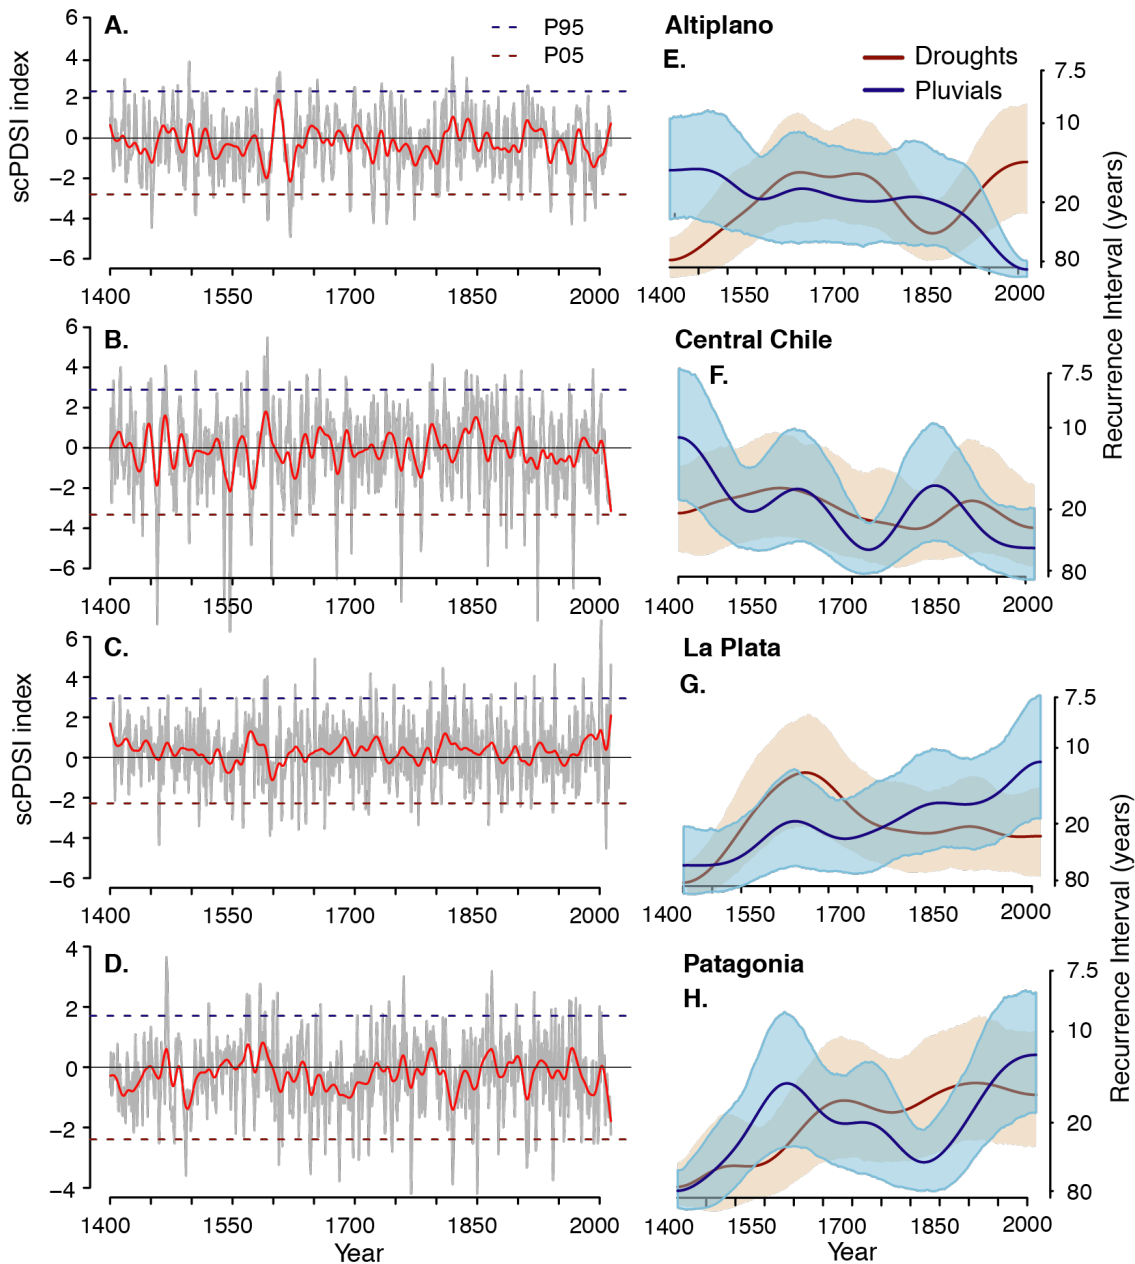

469  
 470  
 471  
 472  
 473  
 474  
 475  
 476  
 477  
 478

**Fig. S7.** Austral summer (December-January-February) scPDSI reconstruction average for four regions: (A) Altiplano, (B) central Chile, (C) la Plata basin and (D) Patagonia, for the period AD 1400–2000. The 25-year smoothing-spline curve (red line) highlights the multi-decadal variability. Red and blue short dashed lines indicate the 5% and 95% percentiles, respectively, from which extreme dry/wet events were selected for the return-time analysis in panels E to H. (E-H) Time-varying frequency of the occurrence rate of extreme dry/wet scPDSI events, between 1400 and 2000. A kernel smoothing method was used with a bandwidth of 50 years. The shaded areas (blue and orange) represent 95% confidence intervals based on 1000 bootstrap simulations.

479

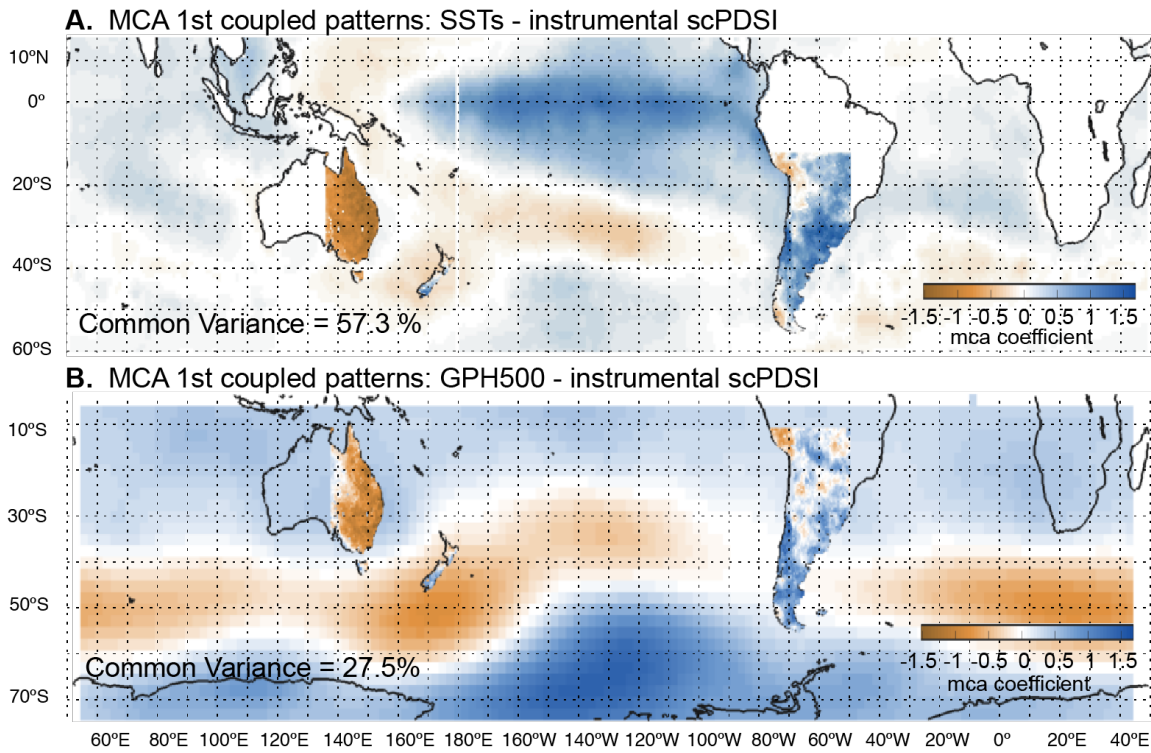

480  
481  
482  
483  
484  
485  
486  
487  
488  
489  
490

**Fig. S8.** Coupled spatiotemporal patterns of variability between large-scale ocean-atmosphere climate forcing and instrumental scPDSI fields from the same domain as SADA and ANZDA. Spatial patterns of the main leading Maximum Covariance Analysis (MCA) mode between instrumental scPDSI and (A) austral summer Sea Surface Temperatures over the common period 1901-2015, and (B) austral summer Geopotential Height (500hpa) over the common period 1948-2015.



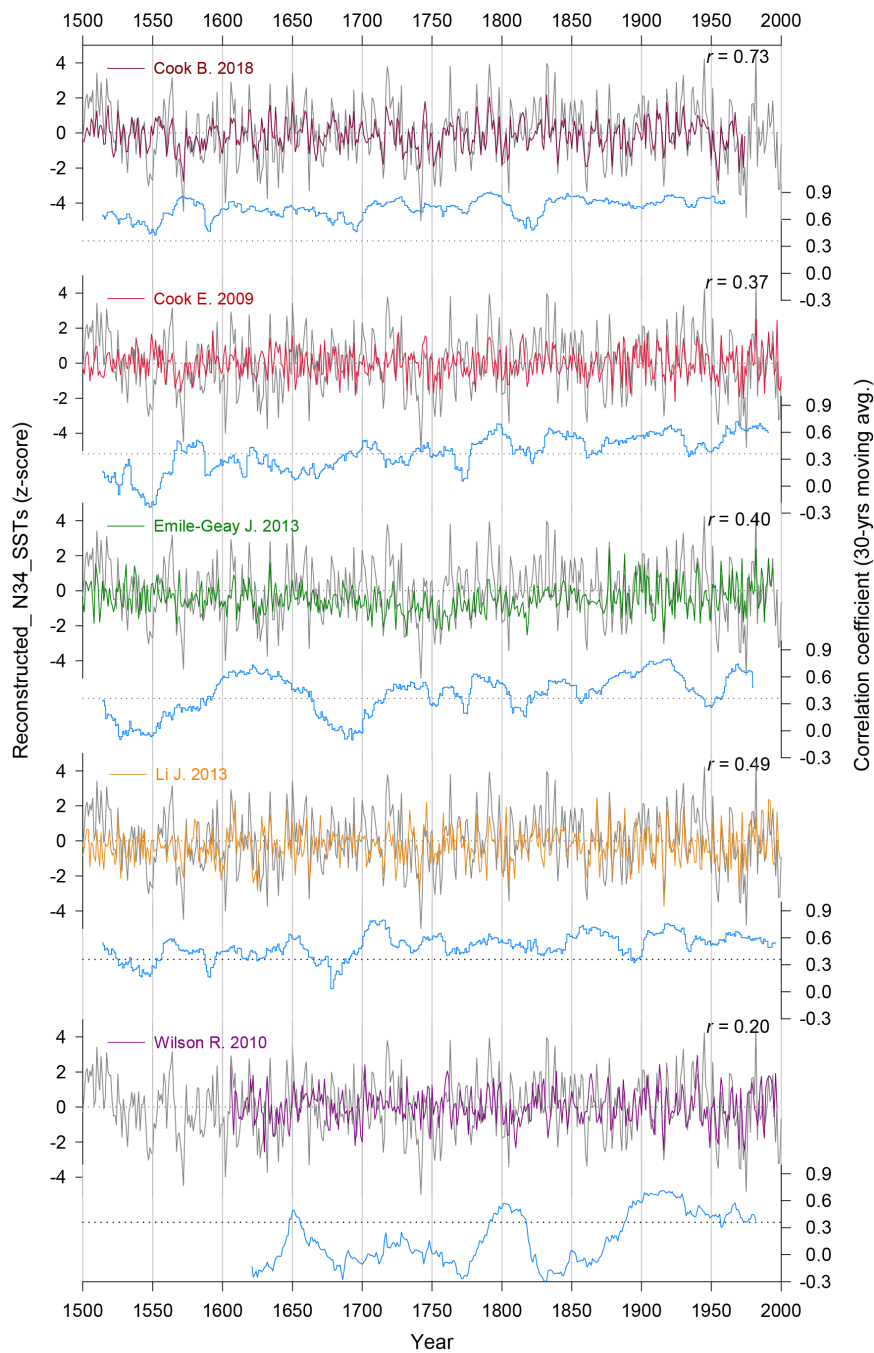

491  
492  
493  
494  
495  
496  
497

**Fig. S9.** Comparisons between reconstructed ENSO indices derived from drought atlases (SADA and ANZDA; this study) and other authors during the period 1500-2000 C.E. The estimated ENSO index from the Maximum Covariance Analysis (1st covariance scPDSI pattern) is shown in each panel by the gray line, and the other reconstructions are colored. Correlation coefficients are indicated in the top right of each panel. The blue lines below each pair of ENSO reconstructions represents their 30-year moving correlation. The dotted line represent the 95% confidence level.

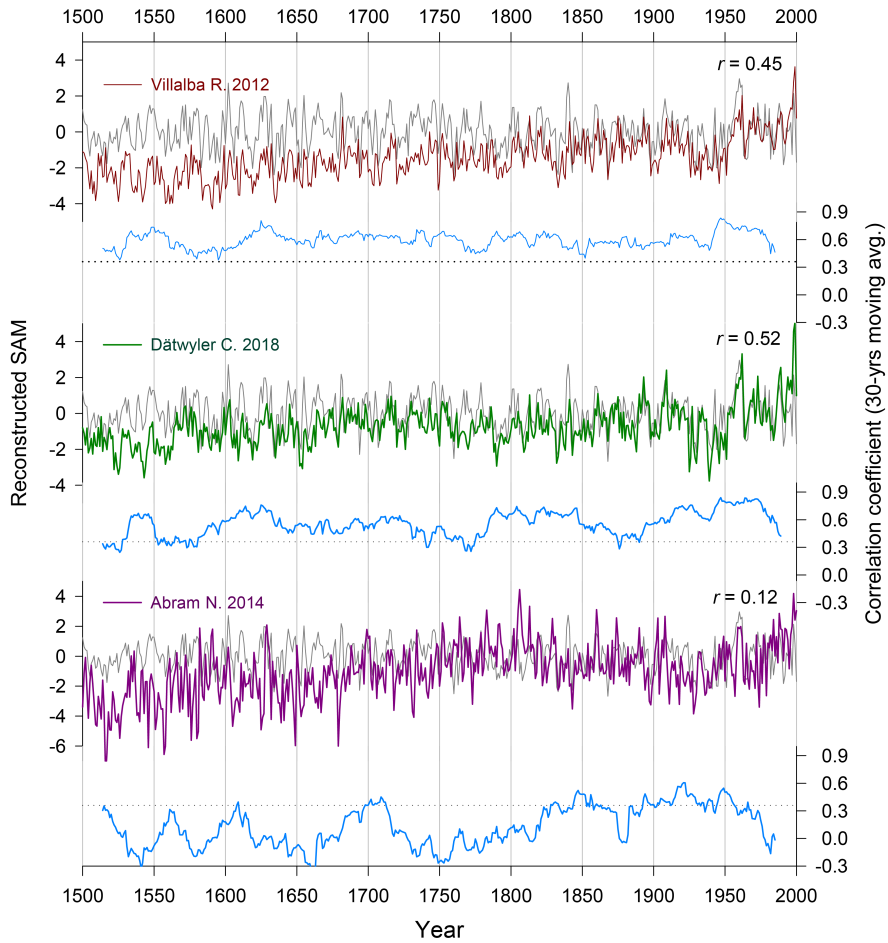

499  
 500  
 501  
 502  
 503  
 504  
 505  
 506  
 507  
 508

**Fig. S10.** Comparisons of the SAM indices derived from the drought atlases (SADA and ANZDA; this study) and other authors during the period 1500-2000 C.E. The estimated SAM index from the Maximum Covariance Analysis (1st covariance scPDSI pattern) is shown in each panel by the gray line, and the other reconstructions are colored. Correlation coefficients are indicated in the top right of the panels. The blue line below SAM the reconstructions represents the 30-year moving correlation. The dotted line represent the 95% confidence level.

**Table S1.** List of tree-ring chronologies used to produce the SADA.

| Species                | Species Code | Start Year | End Year | Latitude °S | Longitude °W | Site Name                  |
|------------------------|--------------|------------|----------|-------------|--------------|----------------------------|
| Adesmia horrida        | ADHO         | 1768       | 1986     | -32 43      | -69 05       | MANANTIA                   |
| Araucaria araucana     | ARAR         | 1400       | 2000     | -37 38      | -71 28       | Alul                       |
| Araucaria araucana     | ARAR         | 1429       | 2000     | -38 48      | -71 12       | Batea Mahuida              |
| Araucaria araucana     | ARAR         | 1400       | 2000     | -38 66      | -71 70       | Captren+Lonquimay          |
| Araucaria araucana     | ARAR         | 1444       | 1974     | -37 51      | -71 02       | Caviahue                   |
| Araucaria araucana     | ARAR         | 1550       | 2000     | -37 52      | -71 04       | CAVIAHUE                   |
| Araucaria araucana     | ARAR         | 1400       | 2000     | -39 27      | -71 51       | Challupen                  |
| Araucaria araucana     | ARAR         | 1400       | 1974     | -38 06      | -70 51       | Chenque Pehuen             |
| Araucaria araucana     | ARAR         | 1675       | 2000     | -38 25      | -71 36       | Coloradito                 |
| Araucaria araucana     | ARAR         | 1607       | 2000     | -38 25      | -71 33       | Colorado Lara              |
| Araucaria araucana     | ARAR         | 1640       | 1974     | -37 48      | -71 04       | Copahue                    |
| Araucaria araucana     | ARAR         | 1525       | 2000     | -39 33      | -71 02       | Ea Nahuel Mapi             |
| Araucaria araucana     | ARAR         | 1512       | 2000     | -38 81      | -71 27       | Icalma                     |
| Araucaria araucana     | ARAR         | 1617       | 1976     | -39 36      | -71 22       | Lago Tromen                |
| Araucaria araucana     | ARAR         | 1400       | 2000     | -39 37      | -71 26       | Lanin                      |
| Araucaria araucana     | ARAR         | 1400       | 1974     | -38 59      | -71 03       | Lonco Luan                 |
| Araucaria araucana     | ARAR         | 1400       | 2000     | -38 25      | -71 36       | Nalca+ColoradoChile        |
| Araucaria araucana     | ARAR         | 1676       | 2000     | -39 09      | -71 15       | Norquinco2                 |
| Araucaria araucana     | ARAR         | 1400       | 2000     | -38 50      | -71 05       | Paso del Arco              |
| Araucaria araucana     | ARAR         | 1400       | 1983     | -39 37      | -71 25       | Paso Tromen                |
| Araucaria araucana     | ARAR         | 1400       | 2000     | -37 50      | -71 02       | Piedra del Aguila          |
| Araucaria araucana     | ARAR         | 1606       | 2000     | -39 19      | -71 17       | Pinalada Redonda           |
| Araucaria araucana     | ARAR         | 1424       | 2000     | -38 38      | -70 45       | Pino Hachado               |
| Araucaria araucana     | ARAR         | 1400       | 1974     | -38 53      | -70 37       | Primeros Pinos             |
| Araucaria araucana     | ARAR         | 1589       | 1989     | -39 08      | -71 11       | Pulmari                    |
| Araucaria araucana     | ARAR         | 1459       | 2000     | -39 28      | -71 46       | Quetrupillan               |
| Araucaria araucana     | ARAR         | 1591       | 2000     | -39 24      | -70 48       | Rahue                      |
| Araucaria araucana     | ARAR         | 1592       | 2000     | -37 56      | -71 22       | Ralco                      |
| Araucaria araucana     | ARAR         | 1450       | 2000     | -39 06      | -71 19       | Remeco                     |
| Araucaria araucana     | ARAR         | 1400       | 2000     | -39 13      | -71 10       | Rucachoroi2                |
| Araucaria araucana     | ARAR         | 1400       | 2000     | -38 18      | -71 42       | Tolhuaca                   |
| Araucaria araucana     | ARAR         | 1673       | 2000     | -37 58      | -71 18       | Vizcacha                   |
| Austrocedrus chilensis | AUCH         | 1733       | 1975     | -37 21      | -71 36       | Abanico                    |
| Austrocedrus chilensis | AUCH         | 1823       | 1975     | -34 55      | -70 42       | Alto de las mesas          |
| Austrocedrus chilensis | AUCH         | 1589       | 1991     | -40 42      | -71 16       | Arroyo minero              |
| Austrocedrus chilensis | AUCH         | 1400       | 2000     | -34 29      | -70 14       | Blanco                     |
| Austrocedrus chilensis | AUCH         | 1400       | 2000     | -34 26      | -70 19       | Ciprecillos                |
| Austrocedrus chilensis | AUCH         | 1473       | 2000     | -34 20      | -70 17       | Ciprecito                  |
| Austrocedrus chilensis | AUCH         | 1576       | 2000     | -40 30      | -71 09       | Co Catillo                 |
| Austrocedrus chilensis | AUCH         | 1596       | 1989     | -39 56      | -71 08       | Collunco alto              |
| Austrocedrus chilensis | AUCH         | 1723       | 1989     | -40 42      | -71 09       | Confluencia 2              |
| Austrocedrus chilensis | AUCH         | 1543       | 2000     | -40 43      | -71 08       | Cuyin Manzano              |
| Austrocedrus chilensis | AUCH         | 1461       | 1989     | -40 44      | -71 06       | Dedo de dios               |
| Austrocedrus chilensis | AUCH         | 1400       | 2000     | -32 39      | -70 49       | El Asiento                 |
| Austrocedrus chilensis | AUCH         | 1400       | 2000     | -34 48      | -70 29       | El Azufre                  |
| Austrocedrus chilensis | AUCH         | 1400       | 2000     | -34 29      | -70 26       | El Baule+Agua de la Muerte |
| Austrocedrus chilensis | AUCH         | 1489       | 2000     | -40 44      | -71 06       | El Centinela               |
| Austrocedrus chilensis | AUCH         | 1400       | 2000     | -34 32      | -70 34       | El Cepillo                 |
| Austrocedrus chilensis | AUCH         | 1641       | 1975     | -37 21      | -71 30       | El Chacay                  |
| Austrocedrus chilensis | AUCH         | 1497       | 2000     | -41 02      | -70 59       | El Guanaco                 |
| Austrocedrus chilensis | AUCH         | 1690       | 1974     | -41 59      | -71 15       | El Maiten                  |
| Austrocedrus chilensis | AUCH         | 1484       | 2000     | -40 39      | -71 24       | El Mirador                 |
| Austrocedrus chilensis | AUCH         | 1553       | 2000     | -35 36      | -70 54       | El Venado                  |
| Austrocedrus chilensis | AUCH         | 1540       | 2000     | -42 57      | -71 13       | Estancia Teresa            |
| Austrocedrus chilensis | AUCH         | 1400       | 2000     | -37 08      | -70 36       | Huingango New              |
| Austrocedrus chilensis | AUCH         | 1690       | 2000     | -41 04      | -71 59       | La Fragua                  |
| Austrocedrus chilensis | AUCH         | 1508       | 2000     | -40 03      | -71 17       | La Hormiga                 |
| Austrocedrus chilensis | AUCH         | 1700       | 1974     | -43 01      | -71 34       | Lago Terraplen             |
| Austrocedrus chilensis | AUCH         | 1700       | 2000     | -37 20      | -71 32       | Laja                       |

|                          |      |      |      |        |        |                               |
|--------------------------|------|------|------|--------|--------|-------------------------------|
| Austrocedrus chilensis   | AUCH | 1539 | 2000 | -41 05 | -71 09 | Los Leones (Cerro Los Leones) |
| Austrocedrus chilensis   | AUCH | 1645 | 2000 | -36 42 | -71 16 | Los Mayos                     |
| Austrocedrus chilensis   | AUCH | 1508 | 2000 | -40 04 | -71 02 | Los Pinos                     |
| Austrocedrus chilensis   | AUCH | 1400 | 2000 | -34 23 | -70 19 | Matancilla                    |
| Austrocedrus chilensis   | AUCH | 1400 | 2000 | -35 52 | -71 00 | Melado+Rancho Maule           |
| Austrocedrus chilensis   | AUCH | 1567 | 2000 | -42 58 | -71 13 | Nahuel Pan                    |
| Austrocedrus chilensis   | AUCH | 1400 | 2000 | -37 42 | -71 18 | Nitrao                        |
| Austrocedrus chilensis   | AUCH | 1562 | 2000 | -39 07 | -71 07 | Norquinco                     |
| Austrocedrus chilensis   | AUCH | 1741 | 1991 | -41 32 | -71 29 | Pampa del Toro                |
| Austrocedrus chilensis   | AUCH | 1679 | 1991 | -40 42 | -71 07 | Paso del viento               |
| Austrocedrus chilensis   | AUCH | 1733 | 1991 | -41 11 | -70 45 | Pilcaniyeu                    |
| Austrocedrus chilensis   | AUCH | 1400 | 2000 | -37 04 | -71 25 | Polcura                       |
| Austrocedrus chilensis   | AUCH | 1400 | 2000 | -34 48 | -70 33 | Quebrada los Helados          |
| Austrocedrus chilensis   | AUCH | 1676 | 1989 | -39 17 | -71 16 | Quillen                       |
| Austrocedrus chilensis   | AUCH | 1585 | 2000 | -38 04 | -71 19 | Ralco-Lepoy                   |
| Austrocedrus chilensis   | AUCH | 1400 | 2000 | -34 48 | -70 31 | Rancho Fonola                 |
| Austrocedrus chilensis   | AUCH | 1572 | 2000 | -39 15 | -71 10 | Rucachoroi                    |
| Austrocedrus chilensis   | AUCH | 1400 | 1996 | -33 47 | -70 15 | San Gabriel                   |
| Austrocedrus chilensis   | AUCH | 1650 | 1991 | -41 03 | -70 59 | San Ramon                     |
| Austrocedrus chilensis   | AUCH | 1613 | 1975 | -34 47 | -70 45 | Santa Isabel                  |
| Austrocedrus chilensis   | AUCH | 1400 | 2000 | -34 27 | -70 25 | Uriola este                   |
| Austrocedrus chilensis   | AUCH | 1500 | 2000 | -34 27 | -70 26 | Uriola Oeste                  |
| Cedrela angustifolia     | CEAN | 1810 | 1981 | -24 36 | -64 35 | Finca el Rey                  |
| Cedrela angustifolia     | CEAN | 1851 | 1981 | -24 65 | -65 25 | Rio Blanco                    |
| Cedrela angustifolia     | CEAN | 1729 | 1982 | -27 08 | -65 51 | Rio Horqueta                  |
| Centrolobium michrocaete | CEMI | 1836 | 2000 | -16 13 | -61 39 | Inpa                          |
| Centrolobium michrocaete | CEMI | 1924 | 2000 | -15 38 | -62 24 | Palestina                     |
| Centrolobium michrocaete | CEMI | 1798 | 2000 | -16 19 | -61 36 | Purupi                        |
| Centrolobium michrocaete | CEMI | 1847 | 2000 | -15 58 | -62 13 | Santa Monica                  |
| Fitzroya cupressoides    | FICU | 1400 | 2000 | -41 30 | -72 30 | Alerce Andino                 |
| Fitzroya cupressoides    | FICU | 1400 | 1993 | -42 16 | -72 46 | Ayacara                       |
| Fitzroya cupressoides    | FICU | 1400 | 2000 | -41 24 | -72 18 | Cerro Nevado                  |
| Fitzroya cupressoides    | FICU | 1400 | 1993 | -41 06 | -71 46 | Horqueta inferior             |
| Fitzroya cupressoides    | FICU | 1400 | 1993 | -41 50 | -71 47 | Horqueta Superior             |
| Fitzroya cupressoides    | FICU | 1400 | 1995 | -41 15 | -71 54 | La Esperanza                  |
| Fitzroya cupressoides    | FICU | 1400 | 1993 | -41 57 | -72 17 | Lago Inexplorado              |
| Fitzroya cupressoides    | FICU | 1400 | 2000 | -41 33 | -72 36 | Lenca                         |
| Fitzroya cupressoides    | FICU | 1400 | 1993 | -40 50 | -72 20 | Los Quetro                    |
| Fitzroya cupressoides    | FICU | 1400 | 2000 | -41 36 | -72 33 | Oro verde                     |
| Fitzroya cupressoides    | FICU | 1400 | 1996 | -40 54 | -73 45 | Pabilos                       |
| Fitzroya cupressoides    | FICU | 1400 | 1994 | -41 52 | -72 32 | Patamay                       |
| Fitzroya cupressoides    | FICU | 1400 | 1992 | -41 00 | -73 43 | Pelada                        |
| Fitzroya cupressoides    | FICU | 1400 | 1992 | -42 44 | -71 58 | Puerto Cafe                   |
| Fitzroya cupressoides    | FICU | 1400 | 1995 | -40 55 | -72 21 | Puntiagudo                    |
| Fitzroya cupressoides    | FICU | 1400 | 1993 | -42 35 | -71 57 | Rio Alejandro                 |
| Fitzroya cupressoides    | FICU | 1400 | 1991 | -41 10 | -71 47 | Rio Alerce                    |
| Fitzroya cupressoides    | FICU | 1400 | 1974 | -42 09 | -71 33 | Rio Cisne                     |
| Fitzroya cupressoides    | FICU | 1400 | 1991 | -41 06 | -71 48 | Rio Frias                     |
| Fitzroya cupressoides    | FICU | 1400 | 1993 | -42 08 | -71 50 | Rio Motoco                    |
| Fitzroya cupressoides    | FICU | 1400 | 1987 | -42 30 | -73 50 | Tiuchue Chiloe                |
| Fitzroya cupressoides    | FICU | 1400 | 1994 | -41 03 | -72 38 | Volcan Apagado                |
| Fitzroya cupressoides    | FICU | 1400 | 1994 | -41 10 | -72 30 | Volcan Osorno                 |
| Juglans australis        | JGAU | 1895 | 2000 | -23 33 | -65 01 | Arroyo San Lucas              |
| Juglans australis        | JGAU | 1791 | 2000 | -24 40 | -64 35 | Cascada Lobitos               |
| Juglans australis        | JGAU | 1805 | 1999 | -22 04 | -63 45 | Cauzuti                       |
| Juglans australis        | JGAU | 1740 | 2000 | -24 45 | -64 39 | Cerro Chanar                  |
| Juglans australis        | JGAU | 1800 | 2000 | -27 40 | -65 46 | Dique Escaba                  |
| Juglans australis        | JGAU | 1813 | 1985 | -27 42 | -65 47 | Dique Escaba juo25m           |
| Juglans australis        | JGAU | 1765 | 1985 | -21 43 | -64 24 | El Arrayal                    |
| Juglans australis        | JGAU | 1840 | 2000 | -26 27 | -64 54 | El Cajon                      |
| Juglans australis        | JGAU | 1678 | 2000 | -24 11 | -64 32 | El Piquete                    |
| Juglans australis        | JGAU | 1858 | 1981 | -26 05 | -65 23 | Finca las Pichanas            |
| Juglans australis        | JGAU | 1709 | 1999 | -22 19 | -64 38 | La Mesada                     |
| Juglans australis        | JGAU | 1826 | 1979 | -25 07 | -65 33 | Los Laureles                  |

|                       |      |      |      |        |        |                             |
|-----------------------|------|------|------|--------|--------|-----------------------------|
| Juglans australis     | JGAU | 1814 | 1994 | -22 19 | -64 40 | Los Toldos                  |
| Juglans australis     | JGAU | 1883 | 2000 | -23 34 | -64 59 | Molular                     |
| Juglans australis     | JGAU | 1779 | 2000 | -23 35 | -64 55 | Nogalar                     |
| Juglans australis     | JGAU | 1796 | 2000 | -23 32 | -65 01 | Pampichuela                 |
| Juglans australis     | JGAU | 1883 | 2000 | -24 38 | -64 33 | Popayan                     |
| Juglans australis     | JGAU | 1688 | 1998 | -23 55 | -65 18 | Rio Bolsas                  |
| Juglans australis     | JGAU | 1783 | 1982 | -27 08 | -65 51 | Rio Horqueta                |
| Juglans australis     | JGAU | 1646 | 1994 | -27 10 | -65 53 | Rio Horqueta N1             |
| Juglans australis     | JGAU | 1849 | 1981 | -24 36 | -64 35 | Rio La Sala                 |
| Juglans australis     | JGAU | 1826 | 1979 | -26 26 | -64 57 | Rio Nio                     |
| Juglans australis     | JGAU | 1739 | 1999 | -22 49 | -64 30 | Rio Pescado                 |
| Juglans australis     | JGAU | 1742 | 1999 | -22 20 | -64 42 | San Jose                    |
| Juglans australis     | JGAU | 1820 | 1982 | -24 36 | -64 35 | Senda el Ciervo             |
| Juglans australis     | JGAU | 1872 | 2000 | -25 59 | -64 48 | Tunillas                    |
| Juglans australis     | JGAU | 1841 | 1999 | -22 21 | -64 42 | Vallecito                   |
| Juglans australis     | JGAU | 1889 | 2000 | -24 10 | -65 23 | Yala                        |
| Juglans australis     | JGAU | 1889 | 2000 | -24 13 | -65 08 | Zapla                       |
| Nothofagus betuloides | NOBE | 1715 | 1986 | -54 42 | -64 40 | Bahia Crossley Isla Estados |
| Nothofagus betuloides | NOBE | 1751 | 1986 | -54 50 | -65 12 | Bahia del Buen Suceso       |
| Nothofagus betuloides | NOBE | 1647 | 1986 | -54 50 | -64 20 | Bahia York                  |
| Nothofagus betuloides | NOBE | 1729 | 2000 | -44 07 | -71 53 | Guerrero Rio Los Nevados    |
| Nothofagus betuloides | NOBE | 1704 | 2000 | -53 44 | -72 28 | Isla Santa Ines             |
| Nothofagus betuloides | NOBE | 1660 | 2000 | -54 13 | -68 28 | Lago Despreciado            |
| Nothofagus betuloides | NOBE | 1527 | 2000 | -54 22 | -68 46 | Lago despreciado L.N.       |
| Nothofagus betuloides | NOBE | 1577 | 2000 | -54 28 | -68 41 | Lago Fagnano betuloides     |
| Nothofagus betuloides | NOBE | 1489 | 2000 | -55 00 | -68 41 | Lago Robalo                 |
| Nothofagus betuloides | NOBE | 1850 | 2000 | -48 24 | -73 50 | Ofhidro Costa PNBO          |
| Nothofagus betuloides | NOBE | 1624 | 2000 | -54 20 | -68 49 | P.L. Despreciado            |
| Nothofagus betuloides | NOBE | 1726 | 1986 | -54 50 | -64 22 | Puerto Parry                |
| Nothofagus betuloides | NOBE | 1528 | 1986 | -54 54 | -66 55 | Rio Moat                    |
| Nothofagus betuloides | NOBE | 1702 | 2000 | -44 44 | -71 56 | Santa Teresa                |
| Nothofagus pumilio    | NOPU | 1810 | 2000 | -35 35 | -70 59 | Altos de Lircay             |
| Nothofagus pumilio    | NOPU | 1666 | 1986 | -54 31 | -67 25 | Aserradero Isla Grande      |
| Nothofagus pumilio    | NOPU | 1755 | 1988 | -45 55 | -71 45 | Balmaceda                   |
| Nothofagus pumilio    | NOPU | 1706 | 1988 | -50 22 | -72 47 | Buenos Aires Sta cruz       |
| Nothofagus pumilio    | NOPU | 1741 | 2000 | -50 21 | -72 47 | Calafate                    |
| Nothofagus pumilio    | NOPU | 1772 | 2000 | -37 55 | -71 22 | Callaqui                    |
| Nothofagus pumilio    | NOPU | 1816 | 1996 | -50 57 | -72 53 | Campo Chileno               |
| Nothofagus pumilio    | NOPU | 1774 | 1996 | -50 57 | -72 54 | Campo Torres                |
| Nothofagus pumilio    | NOPU | 1808 | 1996 | -54 16 | -68 41 | Campo XX Inferior           |
| Nothofagus pumilio    | NOPU | 1805 | 1996 | -54 17 | -68 41 | Campo XX Krummholz          |
| Nothofagus pumilio    | NOPU | 1784 | 1996 | -54 17 | -68 41 | Campo XX Medio              |
| Nothofagus pumilio    | NOPU | 1626 | 1982 | -41 15 | -71 45 | Castano Overo               |
| Nothofagus pumilio    | NOPU | 1861 | 1991 | -41 09 | -71 48 | Castano overo1              |
| Nothofagus pumilio    | NOPU | 1808 | 1991 | -41 09 | -71 48 | Castano overo3              |
| Nothofagus pumilio    | NOPU | 1820 | 1991 | -41 09 | -71 48 | Castano overo4              |
| Nothofagus pumilio    | NOPU | 1820 | 1991 | -41 09 | -71 48 | Castano overo5              |
| Nothofagus pumilio    | NOPU | 1539 | 1991 | -41 09 | -71 48 | Castano overo6              |
| Nothofagus pumilio    | NOPU | 1562 | 1991 | -41 09 | -71 48 | Castano overo7              |
| Nothofagus pumilio    | NOPU | 1572 | 1991 | -41 09 | -71 48 | Castano overo8              |
| Nothofagus pumilio    | NOPU | 1635 | 2000 | -49 18 | -73 00 | Cerro 30 Aniversario        |
| Nothofagus pumilio    | NOPU | 1661 | 1996 | -54 14 | -68 40 | Cerro Balseiro              |
| Nothofagus pumilio    | NOPU | 1734 | 1974 | -50 25 | -72 45 | Cerro Buenos Aires          |
| Nothofagus pumilio    | NOPU | 1730 | 1996 | -51 09 | -73 18 | Cerro Ferrier A             |
| Nothofagus pumilio    | NOPU | 1685 | 1996 | -51 09 | -73 17 | Cerro Ferrier B             |
| Nothofagus pumilio    | NOPU | 1800 | 1996 | -53 55 | -69 43 | Cerro Pascua                |
| Nothofagus pumilio    | NOPU | 1766 | 1985 | -40 20 | -71 14 | Chapelco                    |
| Nothofagus pumilio    | NOPU | 1604 | 2000 | -39 53 | -72 03 | Choshuenco                  |
| Nothofagus pumilio    | NOPU | 1611 | 2000 | -39 53 | -72 03 | Choshuenco2                 |
| Nothofagus pumilio    | NOPU | 1765 | 2000 | -44 43 | -71 27 | Cisne                       |
| Nothofagus pumilio    | NOPU | 1546 | 1991 | -41 16 | -71 38 | Co Diego de Leon            |
| Nothofagus pumilio    | NOPU | 1759 | 2000 | -54 47 | -68 23 | Co Martial                  |
| Nothofagus pumilio    | NOPU | 1731 | 1992 | -47 10 | -72 30 | Co Tamango Inferior         |
| Nothofagus pumilio    | NOPU | 1631 | 1992 | -47 15 | -72 30 | Co Tamango Medio            |

|                         |      |      |      |        |        |                         |
|-------------------------|------|------|------|--------|--------|-------------------------|
| Nothofagus pumilio      | NOPU | 1700 | 1995 | -38 39 | -71 37 | Conguillo krumholz      |
| Nothofagus pumilio      | NOPU | 1728 | 1996 | -38 38 | -71 36 | Conguillo Lengua Abajo  |
| Nothofagus pumilio      | NOPU | 1800 | 1996 | -38 40 | -71 37 | Conguillo Lengua media  |
| Nothofagus pumilio      | NOPU | 1819 | 1996 | -50 48 | -72 30 | Contreras E             |
| Nothofagus pumilio      | NOPU | 1793 | 1996 | -50 48 | -72 36 | Contreras W             |
| Nothofagus pumilio      | NOPU | 1726 | 1986 | -54 26 | -67 92 | Ea Carmen Camino        |
| Nothofagus pumilio      | NOPU | 1743 | 1986 | -54 30 | -67 05 | Ea. Maria Cristina      |
| Nothofagus pumilio      | NOPU | 1664 | 1984 | -54 41 | -67 50 | Estacion Microondas     |
| Nothofagus pumilio      | NOPU | 1793 | 1996 | -53 38 | -68 42 | Estancia Las Flores     |
| Nothofagus pumilio      | NOPU | 1723 | 1985 | -54 03 | -68 34 | Estancia San Justo      |
| Nothofagus pumilio      | NOPU | 1722 | 2000 | -47 10 | -72 30 | Furioso                 |
| Nothofagus pumilio      | NOPU | 1595 | 1985 | -41 10 | -71 56 | Glaciar Frias           |
| Nothofagus pumilio      | NOPU | 1574 | 2000 | -49 04 | -72 54 | Glaciar Huemules        |
| Nothofagus pumilio      | NOPU | 1721 | 1998 | -48 28 | -72 15 | Glaciar Narvaez 1       |
| Nothofagus pumilio      | NOPU | 1606 | 1998 | -48 29 | -72 15 | Glaciar Narvaez 2       |
| Nothofagus pumilio      | NOPU | 1629 | 1998 | -49 21 | -72 58 | Glaciar Piedras Blancas |
| Nothofagus pumilio      | NOPU | 1639 | 1986 | -54 31 | -67 25 | Isla Grande Monticulo   |
| Nothofagus pumilio      | NOPU | 1690 | 2000 | -46 50 | -72 06 | Jeinimeni               |
| Nothofagus pumilio      | NOPU | 1575 | 1984 | -54 39 | -67 52 | Lago Escondido          |
| Nothofagus pumilio      | NOPU | 1600 | 2000 | -54 29 | -69 07 | Lago Fagnano 1          |
| Nothofagus pumilio      | NOPU | 1647 | 1985 | -45 00 | -71 30 | Lago Fontana            |
| Nothofagus pumilio      | NOPU | 1731 | 1986 | -54 28 | -67 43 | Lago Yehuin             |
| Nothofagus pumilio      | NOPU | 1704 | 1995 | -37 29 | -71 20 | Laja Las Cuevas         |
| Nothofagus pumilio      | NOPU | 1728 | 1996 | -37 34 | -71 14 | Laja Lengua Larga       |
| Nothofagus pumilio      | NOPU | 1736 | 1996 | -37 28 | -71 19 | Laja Los Barros         |
| Nothofagus pumilio      | NOPU | 1731 | 1996 | -53 22 | -71 13 | Monte Azul              |
| Nothofagus pumilio      | NOPU | 1773 | 1996 | -52 31 | -71 01 | Monte Gallina           |
| Nothofagus pumilio      | NOPU | 1677 | 1988 | -53 12 | -72 10 | Monte Grande Magallanes |
| Nothofagus pumilio      | NOPU | 1712 | 2000 | -47 07 | -71 54 | Oportus                 |
| Nothofagus pumilio      | NOPU | 1692 | 1986 | -40 40 | -71 25 | Paso Cordoba            |
| Nothofagus pumilio      | NOPU | 1814 | 1991 | -41 07 | -71 48 | Paso de las Nubes1      |
| Nothofagus pumilio      | NOPU | 1662 | 1985 | -54 39 | -67 52 | Paso Garibaldi          |
| Nothofagus pumilio      | NOPU | 1718 | 1991 | -41 07 | -71 48 | Paso de las Nubes 3     |
| Nothofagus pumilio      | NOPU | 1701 | 1991 | -41 07 | -71 48 | Paso de las Nubes 4     |
| Nothofagus pumilio      | NOPU | 1850 | 1991 | -41 07 | -71 48 | Paso de las Nubes 2     |
| Nothofagus pumilio      | NOPU | 1662 | 1988 | -53 30 | -71 10 | Peninsula Brunswick     |
| Nothofagus pumilio      | NOPU | 1761 | 2000 | -54 27 | -68 42 | Portezuelo fagnanoA-new |
| Nothofagus pumilio      | NOPU | 1709 | 2000 | -54 26 | -68 43 | Portezuelo fagnanoB-new |
| Nothofagus pumilio      | NOPU | 1662 | 1998 | -48 28 | -72 09 | Puesto Miraflores       |
| Nothofagus pumilio      | NOPU | 1739 | 1986 | -54 30 | -67 48 | Rio Claro               |
| Nothofagus pumilio      | NOPU | 1705 | 1986 | -54 31 | -66 10 | Rio Malenguena          |
| Nothofagus pumilio      | NOPU | 1657 | 1984 | -54 47 | -68 28 | Rio Pipo                |
| Nothofagus pumilio      | NOPU | 1715 | 2000 | -36 55 | -71 25 | Termas de Chillan       |
| Nothofagus pumilio      | NOPU | 1650 | 2000 | -49 19 | -73 01 | Torre                   |
| Nothofagus pumilio      | NOPU | 1703 | 2000 | -49 19 | -72 56 | Torre Morena 4          |
| Nothofagus pumilio      | NOPU | 1669 | 2000 | -49 19 | -72 59 | Torre Norte             |
| Nothofagus pumilio      | NOPU | 1674 | 2000 | -49 20 | -72 59 | Torre Sur               |
| Nothofagus pumilio      | NOPU | 1593 | 1984 | -54 47 | -68 11 | Valle de Andorra        |
| Nothofagus pumilio      | NOPU | 1611 | 2000 | -49 25 | -73 01 | Valle Tunel             |
| Nothofagus pumilio      | NOPU | 1819 | 1989 | -35 36 | -71 02 | Vilches                 |
| Nothofagus pumilio      | NOPU | 1830 | 2000 | -39 15 | -72 15 | Villarica               |
| Nothofagus pumilio      | NOPU | 1811 | 1996 | -54 57 | -67 31 | was.rwl                 |
| Pilgerodendron uviferum | PIUV | 1597 | 2000 | -53 32 | -72 18 | Bachelor                |
| Pilgerodendron uviferum | PIUV | 1554 | 2000 | -53 49 | -71 04 | Bouchage                |
| Pilgerodendron uviferum | PIUV | 1400 | 2000 | -53 39 | -72 16 | Carlos III              |
| Pilgerodendron uviferum | PIUV | 1518 | 2000 | -42 45 | -73 59 | chrono 104              |
| Pilgerodendron uviferum | PIUV | 1770 | 2000 | -43 03 | -73 54 | chrono 106              |
| Pilgerodendron uviferum | PIUV | 1462 | 2000 | -47 42 | -73 04 | chrono 50               |
| Pilgerodendron uviferum | PIUV | 1741 | 2000 | -43 59 | -72 42 | chrono 60               |
| Pilgerodendron uviferum | PIUV | 1464 | 1994 | -44 19 | -74 17 | Laguna Facil            |
| Pilgerodendron uviferum | PIUV | 1437 | 2000 | -48 02 | -73 07 | Laguna Leal             |
| Pilgerodendron uviferum | PIUV | 1755 | 1993 | -46 09 | -73 27 | Laguna Miranda          |
| Pilgerodendron uviferum | PIUV | 1640 | 1994 | -44 42 | -73 45 | Laguna Valentin         |
| Pilgerodendron uviferum | PIUV | 1595 | 2000 | -48 55 | -74 24 | Moat Is.                |

|                         |      |      |      |        |        |                              |
|-------------------------|------|------|------|--------|--------|------------------------------|
| Pilgerodendron uviferum | PIUV | 1555 | 2000 | -53 45 | -71 00 | Mount Tarn                   |
| Pilgerodendron uviferum | PIUV | 1723 | 2000 | -54 54 | -70 00 | Obriens Is.                  |
| Pilgerodendron uviferum | PIUV | 1637 | 1994 | -49 15 | -74 05 | Pio XI                       |
| Pilgerodendron uviferum | PIUV | 1554 | 1987 | -42 30 | -73 50 | Piuchue Is Chiloe            |
| Pilgerodendron uviferum | PIUV | 1543 | 2000 | -49 06 | -74 24 | Puerto Eden                  |
| Pilgerodendron uviferum | PIUV | 1460 | 1994 | -40 44 | -72 18 | Puyehue* MERGE               |
| Pilgerodendron uviferum | PIUV | 1765 | 1982 | -41 40 | -71 25 | Rio Foyel                    |
| Pilgerodendron uviferum | PIUV | 1458 | 2000 | -48 11 | -73 09 | Rio Pascua                   |
| Pilgerodendron uviferum | PIUV | 1517 | 2000 | -53 49 | -71 07 | San Nicolas                  |
| Pilgerodendron uviferum | PIUV | 1400 | 2000 | -39 36 | -72 06 | San Pablo                    |
| Pilgerodendron uviferum | PIUV | 1677 | 2000 | -53 45 | -72 29 | Santa Ines                   |
| Pilgerodendron uviferum | PIUV | 1489 | 1986 | -43 00 | -72 30 | Santa Lucia Chiloe           |
| Pilgerodendron uviferum | PIUV | 1530 | 2000 | -53 40 | -72 33 | Seno Ballena                 |
| Pilgerodendron uviferum | PIUV | 1400 | 2000 | -48 42 | -74 04 | Tempano                      |
| Pilgerodendron uviferum | PIUV | 1600 | 1993 | -46 11 | -73 34 | Trails Top                   |
| Polylepis tarapacana    | POTA | 1400 | 2000 | -18 58 | -69 01 | Cerro Capitan                |
| Polylepis tarapacana    | POTA | 1573 | 2000 | -22 13 | -66 36 | Cerro Ramada                 |
| Polylepis tarapacana    | POTA | 1431 | 2000 | -22 00 | -67 17 | Cerro Soniquera              |
| Polylepis tarapacana    | POTA | 1400 | 2000 | -22 20 | -67 14 | Cerro Uturunco               |
| Polylepis tarapacana    | POTA | 1400 | 2000 | -19 07 | -68 27 | Frente Sabaya                |
| Polylepis tarapacana    | POTA | 1400 | 2000 | -20 43 | -68 34 | Irruputuncu                  |
| Polylepis tarapacana    | POTA | 1795 | 2000 | -17 13 | -69 13 | Ja Condori+Cnic+serke+huari  |
| Polylepis tarapacana    | POTA | 1761 | 2000 | -17 56 | -69 27 | Nasahuento                   |
| Polylepis tarapacana    | POTA | 1444 | 2000 | -19 22 | -68 55 | Queniza                      |
| Polylepis tarapacana    | POTA | 1484 | 2000 | -18 56 | -69 00 | Surire High                  |
| Polylepis tarapacana    | POTA | 1400 | 2000 | -18 54 | -69 00 | Surire Low                   |
| Polylepis tarapacana    | POTA | 1400 | 2000 | -18 55 | -69 00 | Surire Medio                 |
| Polylepis tarapacana    | POTA | 1414 | 2000 | -19 11 | -68 54 | Taipicollo                   |
| Polylepis tarapacana    | POTA | 1400 | 2000 | -21 30 | -67 52 | Volcan Caquellas             |
| Polylepis tarapacana    | POTA | 1620 | 2000 | -22 35 | -66 33 | Volcan Granada + Cerro Negro |
| Polylepis tarapacana    | POTA | 1400 | 2000 | -18 28 | -69 10 | Volcan Guallatire            |
| Polylepis tarapacana    | POTA | 1650 | 2000 | -18 35 | -69 10 | Volcan Guallatire_D          |
| Prosopis ferox          | PRFE | 1853 | 2000 | -23 08 | -65 21 | Quebrada Sapagua Humahuaca   |

511

512

513 **Dataset S1.** This record reports the scPDSI averages of the grid points from three regions (the  
514 Altiplano, central Chile and La Plata basin), and the occurrences of severe/extreme hydroclimate  
515 events reconstructed by historical information corresponding to the same regions.

516  
517 **Dataset S2.** Estimators of ENSO (ENSO-e) and SAM (SAM-e) variability for the past 500 years  
518 obtained by MCA for reconstructed scPDSI fields from the SADA and ANZDA and the Sea  
519 Surface Temperature and Geopotential Height climate modes.

520  
521 **Dataset S3.** The resulting time series of the difference between both climate index estimators  
522 (ENSO\_e – SAM\_e) and the anomalous negative/positive values by the 5th and 95th percentiles,  
523 respectively. 25 (26) negative (positive) values were associated with coupled anomalous negative  
524 (positive) ENSO-e and positive (negative) SAM-e events.

525

526

## 527 **SI References**

528

- 529 1. I. Harris, P. D. Jones, T. J. Osborn, D. H. Lister, Updated high-resolution grids of monthly  
530 climatic observations – the CRU TS3.10 Dataset. *Int. J. Climatol.* **34**, 623 – 642 (2014).
- 531 2. M. New, M. Hulme, P. D. Jones, Representing twentieth century space-time climate variability.  
532 Part II: Development of 1901-1996 monthly grids of terrestrial surface climate. *J. Climate* **13**,  
533 2217-2238 (2000).
- 534 3. K. Matsuura, National Center for Atmospheric Research Staff. "The Climate Data Guide:  
535 Global (land) precipitation and temperature: Willmott & Matsuura, University of Delaware."  
536 Available at <https://climatedataguide.ucar.edu/climate-data/global-land-precipitation-and-temperature-willmott-matsuura-university-delaware>. Deposited 20 October 2017.
- 537 4. National Center for Atmospheric Research Staff. "The Climate Data Guide: GPCC: Global  
538 Precipitation Climatology Centre." Available at <https://climatedataguide.ucar.edu/climate-data/gpcc-global-precipitation-climatology-centre>. Deposited 20 September 2018.
- 539 5. E. R. Cook, K. J. Anchukaitis, B. M. Buckley, R. D'Arrigo, G. C. Jacoby, W. E. Wright, Asian  
540 monsoon failure and megadrought during the last millennium. *Science* **328**, 486–489 (2010).
- 541 6. N. Wells, S. Goddard, M. J. Hayes, A self-calibrating palmer drought severity index, *J. Climate*,  
542 **17**, 2335–2351, (2004).
- 543 7. H. C. Fritts, Tree rings and climate, (Academic Press, London, 1976).
- 544 8. E. R. Cook, K. R. Briffa, D. M. Meko, D. A. Graybill, G. Funkhouser, The segment length curse  
545 in long tree-ring chronology development for paleoclimatic studies. *The Holocene* **5**, 229-237  
546 (1995).
- 547 9. T. Melvin, K. Briffa, A 'signal-free' approach to dendroclimatic standardization,  
548 *Dendrochronologia* **26**, 71–86 (2008).
- 549 10. J. G. Palmer, E. R. Cook, C. S. M. Turney, K. Allen, P. Fenwick, B. I. Cook, A. O'Donnell, J.  
550 Lough, P. Grierson, P. Baker, Drought variability in the eastern Australia and New Zealand  
551 summer drought atlas (ANZDA, CE 1500–2012) modulated by the Interdecadal Pacific  
552 Oscillation. *Environm. Res. Lett.* **10**, 124002 (2015).
- 553 11. E. R. Cook, C. A. Woodhouse, C. M. Eakin, D. M. Meko, D. W. Stahle, Long-Term Aridity  
554 Changes in the Western United States. *Science* **306**, 1015-1018 (2004).
- 555 12. E. R. Cook, K. J. Anchukaitis, B. M. Buckley, R. D'Arrigo, G. C. Jacoby, W. E. Wright, Asian  
556 monsoon failure and megadrought during the last millennium. *Science* **328**, 486–489 (2010).
- 557 13. E. R. Cook, R. Seager, Y. Kushnir, K. R. Briffa, U. Büntgen, D. Frank, P. J. Krusic, W. Tegel,  
558 G. van der Schrier, L. Andreu-Hayles, M. Baillie, C. Baittinger, N. Bleicher, N. Bonde, D.  
559 Brown, M. Carrer, R. Cooper, K. Čufar, C. Dittmar, J. Esper, C. Griggs, B. Gunnarson, B.  
560 Günther, E. Gutierrez, K. Haneca, S. Helama, F. Herzig, K-U. Heussner, J. Hofmann, P.  
561 Janda, R. Kontic, N. Köse, T. Kyncl, T. Levanič, H. Linderholm, S. Manning, T. M. Melvin, D.  
562 Miles, B. Neuwirth, K. Nicolussi, P. Nola, M. Panayotov, I. Popa, A. Rothe, K. Seftigen, A.  
563 Seim, H. Svarva, M. Svoboda, T. Thun, M. Timonen, R. Touchan, V. Trotsiuk, V. Trouet, F.  
564  
565



- 566 Walder, T. Wazny, R. Wilson, C. Zang, Old World megadroughts and pluvials during the  
567 Common Era. *Sci. Adv.* **1**, e1500561 (2015).
- 568 14. E. R. Cook, D. M. Meko, D. W. Stahle, M. K. Cleaveland, Drought reconstructions for the  
569 continental United States. *J. Clim.* **12**, 1145-1162, (1999).
- 570 15. R. D. Garreaud, M. Vuille, R. Compagnucci, J. Marengo, Present day South American  
571 climate. *Palaeogeogr. Palaeoclim. Palaeoecol.* **281**, 180–195 (2009).
- 572 16. J. Michaelsen, Cross-validation in statistical climate forecast models, *J. Clim. Appl. Meteorol.*,  
573 **26**, 1589–1600, (1987).
- 574 17. D. M., Meko, Dendroclimatic reconstruction with time varying subsets of tree indices, *J. Clim.*  
575 **10**, 687–696 (1997).
- 576 18. E. R. Cook, O. Solomina, V. Matskovsky, B. I. Cook, L. Agafonov, E. Dolgova, A. Karpukhin,  
577 N. Knysh, M. Kulakova, V. Kuznetsova, T. Kyncl, J. Kyncl, O. Maximova, I. Panyushkina, A.  
578 Seim, D. Tishin, T. Wazny, M. Yermokhin. The European Russia Drought Atlas (1400-2016  
579 CE). *Clim. Dyn.* <https://doi.org/10.1007/s00382-019-05115-2> (2020).
- 580 19. M. R. Prieto, R. Garcia-Herrera, Documentary sources from South America: potential for  
581 climate reconstruction. *Palaeogeogr. Palaeoclim. Palaeoecol.* **281**, 196–209 (2009).
- 582 20. A. Gioda, M. R. Prieto, Histoire des sécheresses andines: Potosi El Niño et le Petit Age  
583 Glaciaire, *La Météorologie* **8**, 33–42 (1999).
- 584 21. M. H. Masiokas, R. Villalba, D. A. Christie, E. Betman, B. H. Luckman, C. Le Quesne, M. R.  
585 Prieto, S. Mauget, Snowpack variations since AD 1150 in the Andes of Chile and Argentina  
586 (30°–37°S) inferred from rainfall, tree-ring and documentary records, *J. Geophys. Res.* **117**,  
587 D05112 (2012).
- 588 22. M. R. Prieto, R. Herrera, P. Doussel, Historical evidences of streamflow fluctuations in the  
589 Mendoza River, Argentina, and their relationship with ENSO, *Holocene* **9**, 473–481 (1999).
- 590 23. M. R. Prieto, R. Herrera, T. Castrillejo, P. Doussel, Recent climatic variations and water  
591 availability in the central Andes of Argentina and Chile (1885–1996): The use of historical  
592 records to reconstruct climate (in Spanish), *Meteorologica* **25**, 27–43 (2000).
- 593 24. M. R. Prieto, R. Herrera, P. Doussel, L. Gimeno, P. Ribera, R. García, E. Hernández,  
594 Interannual oscillations and trend of snow occurrence in the Andes region since 1885, *Aust.*  
595 *Meteorol. Mag.* **50**, 164–168 (2001).
- 596 25. Ortlieb L., Major historical rainfalls in central Chile and the chronology of ENSO events during  
597 the XVI-XIX centuries, *Rev. Chil. Hist. Nat.* **67**, 463–485 (1994).
- 598 26. M.R. Prieto, ENSO signals in South America: Rains and floods in the Parana River during  
599 colonial times. *Climatic Change* **83**, 39-54 (2007)
- 600 27. National Center for Atmospheric Research Staff, "The Climate Data Guide: SST data:  
601 HadiSST v1.1." Available at [https://climatedataguide.ucar.edu/climate-data/sst-data-hadisst-](https://climatedataguide.ucar.edu/climate-data/sst-data-hadisst-v11)  
602 [v11](https://climatedataguide.ucar.edu/climate-data/sst-data-hadisst-v11). Deposited 16 September 2019.
- 603 28. N. A. Rayner, D. E. Parker, E. B. Horton, C. K. Folland, L. V. Alexander, D. P. Rowell, E. C.  
604 Kent, A. Kaplan, Global analyses of sea surface temperature, sea ice, and night marine air  
605 temperature since the late nineteenth century *J. Geophys. Res.* **14**, 4407  
606 10.1029/2002JD002670 (2002). Dataset available at  
607 [https://climexp.knmi.nl/data/ihadisst1\\_nino3.4a.dat](https://climexp.knmi.nl/data/ihadisst1_nino3.4a.dat).
- 608 29. E. Kalnay, M. Kanamitsu, R. Kistler, W. Collins, D. Deaven, L. Gandin, M. Iredell, S. Saha, G.  
609 White, J. Woollen, Y. Zhu, M. Chelliah, W. Ebisuzaki, W. Higgins, J. Janowiak, K. C. Mo, C.  
610 Ropelewski, J. Wang, A. Leetmaa, R. Reynolds, R. Jenne, D. Joseph, The NCEP/NCAR 40-  
611 year reanalysis project, *Bull. Amer. Meteor. Soc.* **77**, 437-470 (1996). Dataset available at  
612 <https://www.esrl.noaa.gov/psd/> i
- 613 30. British Antarctic Survey. "An observation-based Southern Hemisphere Annular Mode Index".  
614 Available at <https://legacy.bas.ac.uk/met/gjma/sam.html>. Deposited 14 January, 2020
- 615 31. G. J. Marshall, Trends in the southern annular mode from observations and reanalyses. *J.*  
616 *Clim.* **16**, 4134-4143 (2003).
- 617 32. E. R. Cook, R. D. D'Arrigo, K. J. Anchukaitis. Tree Ring 500 Year ENSO Index  
618 Reconstructions. *IGBP PAGES/World Data Center for Paleoclimatology Data Contribution*  
619 *Series # 2009-105*, (NOAA/NCDC Paleoclimatology Program, Boulder CO, USA, 2009).

- 620 33. J. Li, S.-P. Xie, E. R. Cook, , M. S. Morales, D. Christie, F. Chen, R. D'Arrigo, N. C. Johnson,  
621 A. M. Fowler, X. Gou, K. Fang, El Niño modulations during the past seven centuries, *Nat.*  
622 *Clim. Change* **3**, 822–826 (2013).
- 623 34. B. I. Cook, A. P. Williams, J. E. Smerdon, J. G. Palmer, E. R. Cook, D. W. Stahle, S. Coats,  
624 Cold tropical Pacific sea surface temperatures during the late sixteenth-century North  
625 American megadrought. *J. Geophys. Res. Atmosph.* **123**, 11307–11320 (2018).
- 626 35. R. Wilson, E. Cook, R. D'Arrigo, N. Riedwyl, M. N. Evans, A. Tudhope, R. Allan, .  
627 Reconstructing ENSO: The influence of method, proxy data, climate forcing and  
628 teleconnections. *J. Quaternary Sci.* **25**, 62–78 (2010).
- 629 36. J. Emile-Geay, K. M. Cobb, M. E. Mann, A. T. Wittenberg, Estimating central equatorial  
630 Pacific SST variability over the past millennium. Part 2: Reconstructions and implications. *J.*  
631 *Clim.* **26**, 2329–2352 (2013).
- 632 37. R. Villalba, A. Lara, M. H. Masiokas, R. R. Urrutia, B. H. Luckman, G. J. Marshall, I. A.  
633 Mundo, D. A. Christie, E. R. Cook, R. Neukom, K. Allen, P. Fenwick, J. A. Boninsegna, A. M.  
634 Srur, M. S. Morales, D. Araneo, J. G. Palmer, E. Cuq, J. C. Aravena, A. Holz, C. LeQuesne,  
635 Unusual Southern Hemisphere tree growth patterns induced by changes in the southern  
636 annular mode. *Nat. Geosc.* **5**, 793–798 (2012).
- 637 38. N. J. Abram, R. Mulvaney, F. Vimeux, S. J. Phipps, J. Turner, M. H. England, Evolution of the  
638 Southern Annular Mode during the past millennium. *Nat. Clim. Change* **4**, 564–569 (2014).
- 639 39. C. Dätwyler, R. Neukom, N. J. Abram, A. J. E. Gallant, M. Grosjean, M. Jacques-Coper, D. J.  
640 Karoly, R. Villalba, Teleconnection stationarity, variability and trends of the Southern Annular  
641 Mode (SAM) during the last millennium. *Clim. Dyn.* **51**, 2321–2339 (2018).
- 642
- 643
